# Supplementary material
Source: PubMed Central journal article supplement (PMC1891260)
Supplement: pnas_0611051104_11.pdf [file pnas_0611051104_11.pdf]

**Table 4. Specimens used in this study**

| No. | Genus                                                    | Species              | Origin     | Museum voucher | Lab tissue no. | Genbank accession no. |          |          |     | Data set |         |        |
|-----|----------------------------------------------------------|----------------------|------------|----------------|----------------|-----------------------|----------|----------|-----|----------|---------|--------|
|     |                                                          |                      |            |                |                | 12S                   | 16S      | Ragl     | Tyr | 280 sp.  | 146 sp. | 65 sp. |
| 1   | <i>Eleutherodactylus</i><br>( <i>Eleutherodactylus</i> ) | <i>portoricensis</i> | This study | USNM326885     | 101784         | EF493720              | EF493548 |          |     | x        |         |        |
| 2   | <i>Eleutherodactylus</i><br>( <i>Eleutherodactylus</i> ) | <i>wightmanae</i>    | This study | USNM326905     | 172080         | EF493721              | EF493549 |          |     | x        |         |        |
| 3   | <i>Eleutherodactylus</i><br>( <i>Eleutherodactylus</i> ) | <i>coqui</i>         | This study | USNM305421     | 172037         | EF493722              | EF493550 |          |     | x        |         |        |
| 4   | <i>Eleutherodactylus</i><br>( <i>Eleutherodactylus</i> ) | <i>schwartzi</i>     | This study | No voucher     | 266012         | EF493723              | EF493551 |          |     | x        |         |        |
| 5   | <i>Eleutherodactylus</i><br>( <i>Eleutherodactylus</i> ) | <i>gryllus</i>       | This study | USNM269304     | 101684         | EF493724              | EF493552 |          |     | x        |         |        |
| 6   | <i>Eleutherodactylus</i><br>( <i>Eleutherodactylus</i> ) | <i>sp. 1</i>         | This study | UPRRP6361      | 267815         | EF493538              | EF493365 |          |     | x        |         |        |
| 7   | <i>Eleutherodactylus</i><br>( <i>Eleutherodactylus</i> ) | <i>cochranae</i>     | This study | USNM326775     | 172062         | EF493725              | EF493555 |          |     | x        |         |        |
| 8   | <i>Eleutherodactylus</i><br>( <i>Eleutherodactylus</i> ) | <i>hedricki</i>      | This study | USNM564995     | 191587         | EF493726              | EF493553 |          |     | x        |         |        |
| 9   | <i>Eleutherodactylus</i><br>( <i>Eleutherodactylus</i> ) | <i>brittoni</i>      | This study | USNM326765     | 172078         | EF493727              | EF493554 |          |     | x        |         |        |
| 10  | <i>Eleutherodactylus</i><br>( <i>Eleutherodactylus</i> ) | <i>antillensis</i>   | This study | USNM326747     | 172065         | EF493728              | EF493556 |          |     | x        |         |        |
| 11  | <i>Eleutherodactylus</i><br>( <i>Eleutherodactylus</i> ) | <i>eneidae</i>       | This study | USNM326857     | 101754         | EF493729              | EF493557 |          |     | x        |         |        |
| 12  | <i>Eleutherodactylus</i><br>( <i>Eleutherodactylus</i> ) | <i>locustus</i>      | This study | USNM326861     | 172085         | EF493730              | EF493558 |          |     | x        |         |        |
| 13  | <i>Eleutherodactylus</i><br>( <i>Eleutherodactylus</i> ) | <i>cooki</i>         | This study | USNM326784     | 160048         | EF493539              | EF493413 | EF493455 |     | x        | x       | x      |
| 14  | <i>Eleutherodactylus</i><br>( <i>Eleutherodactylus</i> ) | <i>flavescens</i>    | This study | USNM331662     | 102358         | EF493731              | EF493559 |          |     | x        |         |        |
| 15  | <i>Eleutherodactylus</i><br>( <i>Eleutherodactylus</i> ) | <i>martinicensis</i> | This study | USNM565001     | 102092         | EF493343              | EF493419 | EF493456 |     | x        | x       | x      |
| 16  | <i>Eleutherodactylus</i><br>( <i>Eleutherodactylus</i> ) | <i>amplinypha</i>    | This study | USNM564978     | 194183         | EF493732              | EF493560 |          |     | x        |         |        |

| No. | Genus                                                    | Species             | Origin     | Museum voucher | Lab tissue no. | Genbank accession no. |          |          |     | Data set |         |        |
|-----|----------------------------------------------------------|---------------------|------------|----------------|----------------|-----------------------|----------|----------|-----|----------|---------|--------|
|     |                                                          |                     |            |                |                | I2S                   | I6S      | Ragl     | Tyr | 280 sp.  | 146 sp. | 65 sp. |
| 17  | <i>Eleutherodactylus</i><br>( <i>Eleutherodactylus</i> ) | <i>johnstonei</i>   | This study | USNM336018     | 172650         | EF493733              | EF493561 |          |     | x        |         |        |
| 18  | <i>Eleutherodactylus</i><br>( <i>Eleutherodactylus</i> ) | <i>pinchoni</i>     | This study | USNM565006     | 101896         | EF493734              | EF493562 |          |     | x        |         |        |
| 19  | <i>Eleutherodactylus</i><br>( <i>Eleutherodactylus</i> ) | <i>barlagnei</i>    | This study | USNM564982     | 102110         | EF493735              | EF493563 |          |     | x        |         |        |
| 20  | <i>Eleutherodactylus</i><br>( <i>Eleutherodactylus</i> ) | <i>auriculatus</i>  | This study | USNM564980     | 192808         | EF493344              | EF493417 | EF493458 |     | x        | x       | x      |
| 21  | <i>Eleutherodactylus</i><br>( <i>Eleutherodactylus</i> ) | <i>bartonsmithi</i> | This study | USNM309753     | 190019         | EF493736              | EF493576 |          |     | x        |         |        |
| 22  | <i>Eleutherodactylus</i><br>( <i>Eleutherodactylus</i> ) | <i>glamyus</i>      | This study | USNM564987     | 190453         | EF493737              | EF493575 |          |     | x        |         |        |
| 23  | <i>Eleutherodactylus</i><br>( <i>Eleutherodactylus</i> ) | <i>mariposa</i>     | This study | MNHNCu591      | 190919         | EF493738              | EF493573 |          |     | x        |         |        |
| 24  | <i>Eleutherodactylus</i><br>( <i>Eleutherodactylus</i> ) | <i>ronaldi</i>      | This study | USNM309760     | 190023         | EF493739              | EF493574 |          |     | x        |         |        |
| 25  | <i>Eleutherodactylus</i><br>( <i>Eleutherodactylus</i> ) | <i>eileenae</i>     | This study | No voucher     | 172823         | EF493740              | EF493577 |          |     | x        |         |        |
| 26  | <i>Eleutherodactylus</i><br>( <i>Eleutherodactylus</i> ) | <i>minutus</i>      | This study | USNM331987     | 101305         | EF493741              | EF493578 |          |     | x        |         |        |
| 27  | <i>Eleutherodactylus</i><br>( <i>Eleutherodactylus</i> ) | <i>poolei</i>       | This study | USNM332236     | 160779         | EF493742              | EF493579 |          |     | x        |         |        |
| 28  | <i>Eleutherodactylus</i><br>( <i>Eleutherodactylus</i> ) | <i>haitianus</i>    | This study | No voucher     | 103103         | EF493743              | EF493583 |          |     | x        |         |        |
| 29  | <i>Eleutherodactylus</i><br>( <i>Eleutherodactylus</i> ) | <i>abbotti</i>      | This study | USNM564974     | 267594         | EF493540              | EF493412 | EF493457 |     | x        | x       | x      |
| 30  | <i>Eleutherodactylus</i><br>( <i>Eleutherodactylus</i> ) | <i>audanti</i>      | This study | USNM331514     | 161405         | EF493744              | EF493584 |          |     | x        |         |        |
| 31  | <i>Eleutherodactylus</i><br>( <i>Eleutherodactylus</i> ) | <i>sp. 2</i>        | This study | USNM337773     | 161469         | EF493745              | EF493580 |          |     | x        |         |        |
| 32  | <i>Eleutherodactylus</i><br>( <i>Eleutherodactylus</i> ) | <i>parabates</i>    | This study | USNM332136     | 161393         | EF493746              | EF493581 |          |     | x        |         |        |
| 33  | <i>Eleutherodactylus</i>                                 | <i>pitiunus</i>     | This study | USNM332229     | 161658         | EF493747              | EF493582 |          |     | x        |         |        |

| No. | Genus                                        | Species               | Origin     | Museum voucher | Lab tissue no. | Genbank accession no. |          |          |     | Data set |         |        |  |
|-----|----------------------------------------------|-----------------------|------------|----------------|----------------|-----------------------|----------|----------|-----|----------|---------|--------|--|
|     |                                              |                       |            |                |                | 12S                   | 16S      | Ragl     | Tyr | 280 sp.  | 146 sp. | 65 sp. |  |
|     | <i>(Eleutherodactylus)</i>                   |                       |            |                |                |                       |          |          |     |          |         |        |  |
| 34  | <i>Eleutherodactylus (Eleutherodactylus)</i> | <i>ionthus</i>        | This study | USNM309757     | 190915         | EF493748              | EF493564 |          |     | x        |         |        |  |
| 35  | <i>Eleutherodactylus (Eleutherodactylus)</i> | <i>guantanamera</i>   | This study | MNHNCu590      | 191061         | EF493749              | EF493565 |          |     | x        |         |        |  |
| 36  | <i>Eleutherodactylus (Eleutherodactylus)</i> | <i>varians</i>        | This study | USNM309763     | 172526         | EF493750              | EF493566 |          |     | x        |         |        |  |
| 37  | <i>Eleutherodactylus (Eleutherodactylus)</i> | <i>leberi</i>         | This study | USNM309758     | 190598         | EF493342              | EF493403 | EF493459 |     | x        | x       | x      |  |
| 38  | <i>Eleutherodactylus (Eleutherodactylus)</i> | <i>melacara</i>       | This study | USNM309733     | 190442         | EF493751              | EF493567 |          |     | x        |         |        |  |
| 39  | <i>Eleutherodactylus (Eleutherodactylus)</i> | <i>lamprotes</i>      | This study | USNM564997     | 192242         | EF493379              |          | EF493460 |     | x        | x       | x      |  |
| 40  | <i>Eleutherodactylus (Eleutherodactylus)</i> | <i>fowleri</i>        | This study | USNM269266     | 160239         | EF493752              | EF493568 |          |     | x        |         |        |  |
| 41  | <i>Eleutherodactylus (Eleutherodactylus)</i> | <i>wetmorei</i>       | This study | USNM332369     | 104639         | EF493753              | EF493569 |          |     | x        |         |        |  |
| 42  | <i>Eleutherodactylus (Eleutherodactylus)</i> | <i>auriculatoides</i> | This study | USNM331627     | 161584         | EF493754              | EF493572 |          |     | x        |         |        |  |
| 43  | <i>Eleutherodactylus (Eleutherodactylus)</i> | <i>patriciae</i>      | This study | No voucher     | 161628         | EF493755              | EF493570 |          |     | x        |         |        |  |
| 44  | <i>Eleutherodactylus (Eleutherodactylus)</i> | <i>montanus</i>       | This study | USNM332069     | 161648         | EF493756              | EF493571 |          |     | x        |         |        |  |
| 45  | <i>Eleutherodactylus (Eleutherodactylus)</i> | <i>richmondi</i>      | This study | USNM326894     | 172042         | EF493541              |          | EF493461 |     | x        | x       | x      |  |
| 46  | <i>Eleutherodactylus (Eleutherodactylus)</i> | <i>unicolor</i>       | This study | USNM326897     | 160038         | EF493542              | EF493398 | EF493462 |     | x        | x       | x      |  |
| 47  | <i>Eleutherodactylus (Pelorius)</i>          | <i>hypostenor</i>     | This study | USNM257731     | 101336         | EF493757              | EF493585 |          |     | x        |         |        |  |
| 48  | <i>Eleutherodactylus (Pelorius)</i>          | <i>parapelates</i>    | This study | USNM257726     | 104622         | EF493758              | EF493587 |          |     | x        |         |        |  |
| 49  | <i>Eleutherodactylus (Pelorius)</i>          | <i>ruthae</i>         | This study | USNM257752     | 160686         | EF493759              | EF493586 |          |     | x        |         |        |  |

| No. | Genus                               | Species              | Origin                   | Museum voucher           | Lab tissue no.   | Genbank accession no. |          |          |     | Data set |         |        |
|-----|-------------------------------------|----------------------|--------------------------|--------------------------|------------------|-----------------------|----------|----------|-----|----------|---------|--------|
|     |                                     |                      |                          |                          |                  | I2S                   | I6S      | Ragl     | Tyr | 280 sp.  | 146 sp. | 65 sp. |
| 50  | <i>Eleutherodactylus (Pelorius)</i> | <i>nortoni</i>       | This study               | USNM257744               | 160630           | EF493760              | EF493588 |          |     | x        |         |        |
| 51  | <i>Eleutherodactylus (Pelorius)</i> | <i>chlorophenax</i>  | This study               | USNM257730               | 160673           | EF493543              | EF493589 |          |     | x        |         |        |
| 52  | <i>Eleutherodactylus (Pelorius)</i> | <i>inoptatus</i>     | This study               | USNM331931               | 101237           | EF493380              | EF493405 | EF493463 |     | x        | x       | x      |
| 53  | <i>Eleutherodactylus</i>            | <i>counouspeus</i>   | This study               | USNM329989               | 103848           | EF493719              |          |          |     | x        | x       |        |
| 54  | <i>Eleutherodactylus (Eulhyas)</i>  | <i>cundalli</i>      | This study               | USNM266364               | 103511           | EF493761              | EF493612 |          |     | x        |         |        |
| 55  | <i>Eleutherodactylus (Eulhyas)</i>  | <i>glaucoreius</i>   | This study               | USNM305366               | 103568           | EF493762              | EF493613 |          |     | x        |         |        |
| 56  | <i>Eleutherodactylus (Eulhyas)</i>  | <i>cavernicola</i>   | This study               | USNM266357               | 103261           | EF493763              | EF493614 |          |     | x        |         |        |
| 57  | <i>Eleutherodactylus (Eulhyas)</i>  | <i>gossei</i>        | This study               | USNM327419               | 103312           | EF493716              | EF493410 | EF493466 |     | x        | x       | x      |
| 58  | <i>Eleutherodactylus (Eulhyas)</i>  | <i>junori</i>        | This study               | USNM269239               | 161028           | EF493764              | EF493617 |          |     | x        |         |        |
| 59  | <i>Eleutherodactylus (Eulhyas)</i>  | <i>griphus</i>       | This study               | USNM564992               | 103185           | EF493381              | EF493415 | EF493465 |     | x        | x       | x      |
| 60  | <i>Eleutherodactylus (Eulhyas)</i>  | <i>pentasyringos</i> | This study               | USNM266455               | 103477           | EF493765              | EF493615 |          |     | x        |         |        |
| 61  | <i>Eleutherodactylus (Eulhyas)</i>  | <i>pantoni</i>       | This study               | USNM327822               | 103514           | EF493766              | EF493616 |          |     | x        |         |        |
| 62  | <i>Eleutherodactylus (Eulhyas)</i>  | <i>orcutti</i>       | This study               | USNM327808               | 103499           | EF493767              | EF493619 |          |     | x        |         |        |
| 63  | <i>Eleutherodactylus (Eulhyas)</i>  | <i>alticola</i>      | This study               | USNM266340               | 103583           | EF493768              | EF493620 |          |     | x        |         |        |
| 64  | <i>Eleutherodactylus (Eulhyas)</i>  | <i>fuscus</i>        | This study               | USNM266380               | 103205           | EF493769              | EF493618 |          |     | x        |         |        |
| 65  | <i>Eleutherodactylus (Eulhyas)</i>  | <i>jamaicensis</i>   | This study               | USNM327594               | 161119           | EF493770              | EF493621 |          |     | x        |         |        |
| 66  | <i>Eleutherodactylus (Eulhyas)</i>  | <i>andrewsi</i>      | This study<br>This study | USNM327267<br>USNM327274 | 171593<br>103275 | EF493544              | EF493623 |          |     | x        |         |        |

| No. | Genus                             | Species             | Origin     | Museum voucher | Lab tissue no. | Genbank accession no. |          |          |          | Data set |         |        |
|-----|-----------------------------------|---------------------|------------|----------------|----------------|-----------------------|----------|----------|----------|----------|---------|--------|
|     |                                   |                     |            |                |                | I2S                   | I6S      | Ragl     | Tyr      | 280 sp.  | 146 sp. | 65 sp. |
| 67  | <i>Eleutherodactylus (Euhyas)</i> | <i>nubicola</i>     | This study | USNM327777     | 103272         | EF493771              | EF493622 |          |          | x        |         |        |
| 68  | <i>Eleutherodactylus (Euhyas)</i> | <i>grabhami</i>     | This study | USNM327565     | 161260         | EF493772              | EF493624 |          |          | x        |         |        |
| 69  | <i>Eleutherodactylus (Euhyas)</i> | <i>sisyphodemus</i> | This study | USNM266467     | 103219         | EF493773              | EF493625 |          |          | x        |         |        |
| 70  | <i>Eleutherodactylus (Euhyas)</i> | <i>luteolus</i>     | This study | USNM327744     | 101469         | EF493545              |          |          | EF493464 | x        | x       | x      |
| 71  | <i>Eleutherodactylus (Euhyas)</i> | <i>riparius</i>     | 1          | n/a            | n/a            | Y10944                |          |          |          | x        | x       |        |
| 72  | <i>Eleutherodactylus (Euhyas)</i> | <i>rivularis</i>    | This study | USNM565009     | 193690         | EF493376              | EF493626 |          |          | x        |         |        |
| 73  | <i>Eleutherodactylus (Euhyas)</i> | <i>toa</i>          | This study | USNM306544     | 191333         | EF493774              | EF493627 |          |          | x        |         |        |
| 74  | <i>Eleutherodactylus (Euhyas)</i> | <i>cuneatus</i>     | This study | USNM564985     | 191146         | EF493775              | EF493608 |          |          | x        |         |        |
| 75  | <i>Eleutherodactylus (Euhyas)</i> | <i>turquinensis</i> | This study | USNM348803     | 193530         | EF493776              | EF493609 |          |          | x        |         |        |
| 76  | <i>Eleutherodactylus (Euhyas)</i> | <i>darlingtoni</i>  | This study | USNM307236     | 104190         | EF493777              | EF493610 |          |          | x        |         |        |
| 77  | <i>Eleutherodactylus (Euhyas)</i> | <i>leoncei</i>      | This study | USNM564999     | 267599         | EF493375              | EF493715 | EF493404 | EF493468 | x        | x       | x      |
| 78  | <i>Eleutherodactylus (Euhyas)</i> | <i>alcoae</i>       | This study | USNM564977     | 194867         | EF493382              |          |          | EF493406 | x        | x       | x      |
| 79  | <i>Eleutherodactylus (Euhyas)</i> | <i>armstrongi</i>   | This study | USNM329962     | 160557         | EF493778              | EF493611 |          |          | x        |         |        |
| 80  | <i>Eleutherodactylus (Euhyas)</i> | <i>rhodesi</i>      | This study | USNM332259     | 267890         | EF493779              | EF493629 |          |          | x        |         |        |
| 81  | <i>Eleutherodactylus (Euhyas)</i> | <i>weinlandi</i>    | This study | USNM332332     | 160385         | EF493780              | EF493630 |          |          | x        |         |        |
| 82  | <i>Eleutherodactylus (Euhyas)</i> | <i>grahami</i>      | This study | USNM564990     | 192409         | EF493781              | EF493632 |          |          | x        |         |        |

|    |                                               |                       |            |            |        |          |          |          |          |   |   |   |
|----|-----------------------------------------------|-----------------------|------------|------------|--------|----------|----------|----------|----------|---|---|---|
| 83 | <i>Eleutherodactylus</i><br>( <i>Euhyas</i> ) | <i>pictissimus</i>    | This study | USNM266310 | 101354 | EF493782 | EF493631 |          |          | X |   |   |
| 84 | <i>Eleutherodactylus</i><br>( <i>Euhyas</i> ) | <i>lentus</i>         | This study | USNM564998 | 266089 | EF493717 | EF493471 | EF493418 | EF493471 | X | X | X |
| 85 | <i>Eleutherodactylus</i><br>( <i>Euhyas</i> ) | <i>monensis</i>       | This study | USNM565002 | 192871 | EF493783 | EF493633 |          |          | X |   |   |
| 86 | <i>Eleutherodactylus</i><br>( <i>Euhyas</i> ) | <i>probolaeus</i>     | This study | USNM322252 | 160303 | EF493784 | EF493634 |          |          | X |   |   |
| 87 | <i>Eleutherodactylus</i><br>( <i>Euhyas</i> ) | <i>bresslerae</i>     | This study | USNM564983 | 190021 | EF493785 | EF493635 |          |          | X |   |   |
| 88 | <i>Eleutherodactylus</i><br>( <i>Euhyas</i> ) | <i>ricordii</i>       | This study | USNM565008 | 190351 | EF493786 | EF493636 |          |          | X |   |   |
| 89 | <i>Eleutherodactylus</i><br>( <i>Euhyas</i> ) | <i>acmonis</i>        | This study | USNM564975 | 190024 | EF493787 | EF493637 |          |          | X |   |   |
| 90 | <i>Eleutherodactylus</i><br>( <i>Euhyas</i> ) | <i>orientalis</i>     | This study | USNM565003 | 190034 | EF493373 | EF493592 |          |          | X |   |   |
| 91 | <i>Eleutherodactylus</i><br>( <i>Euhyas</i> ) | <i>etheridgei</i>     | This study | USNM335715 | 161908 | EF493794 | EF493593 |          |          | X |   |   |
| 92 | <i>Eleutherodactylus</i><br>( <i>Euhyas</i> ) | <i>limbatus</i>       | This study | USNM565000 | 172513 | EF493795 | EF493590 |          |          | X |   |   |
| 93 | <i>Eleutherodactylus</i><br>( <i>Euhyas</i> ) | <i>iberia</i>         | This study | MNHNCu1001 | 266768 | EF493374 | EF493591 |          |          | X |   |   |
| 94 | <i>Eleutherodactylus</i><br>( <i>Euhyas</i> ) | <i>cubanus</i>        | This study | No voucher | 193693 | EF493796 | EF493594 |          |          | X |   |   |
| 95 | <i>Eleutherodactylus</i><br>( <i>Euhyas</i> ) | <i>casparii</i>       | This study | USNM564984 | 172843 | EF493788 | EF493599 |          |          | X |   |   |
| 96 | <i>Eleutherodactylus</i><br>( <i>Euhyas</i> ) | <i>planirostris</i>   | This study | USNM565007 | 192884 | EF493346 | EF493396 | EF493346 | EF493470 | X | X | X |
| 97 | <i>Eleutherodactylus</i><br>( <i>Euhyas</i> ) | <i>guanahacabibes</i> | This study | USNM564993 | 192798 | EF493789 | EF493600 |          |          | X |   |   |
| 98 | <i>Eleutherodactylus</i><br>( <i>Euhyas</i> ) | <i>tonyi</i>          | This study | No voucher | 193932 | EF493790 | EF493602 |          |          | X |   |   |
| 99 | <i>Eleutherodactylus</i><br>( <i>Euhyas</i> ) | <i>rogersi</i>        | This study | USNM565010 | 192891 | EF493372 | EF493603 |          |          | X |   |   |

|     |                                               |                     |            |            |        |          |          |          |          |  |   |   |
|-----|-----------------------------------------------|---------------------|------------|------------|--------|----------|----------|----------|----------|--|---|---|
| 100 | <i>Eleutherodactylus</i><br>( <i>Euhyas</i> ) | <i>goini</i>        | This study | USNM335725 | 172589 | EF493791 | EF493604 |          |          |  | X |   |
| 101 | <i>Eleutherodactylus</i><br>( <i>Euhyas</i> ) | <i>thomasi</i>      | This study | No voucher | 266681 | EF493370 | EF493605 |          |          |  | X |   |
| 102 | <i>Eleutherodactylus</i><br>( <i>Euhyas</i> ) | <i>blairhedgesi</i> | This study | No voucher | 266679 | EF493371 | EF493606 |          |          |  | X |   |
| 103 | <i>Eleutherodactylus</i><br>( <i>Euhyas</i> ) | <i>pinarensis</i>   | This study | USNM565005 | 191490 | EF493792 | EF493607 |          |          |  | X |   |
| 104 | <i>Eleutherodactylus</i><br>( <i>Euhyas</i> ) | <i>atkinsi</i>      | This study | USNM335686 | 172520 | EF493797 | EF493598 |          |          |  | X |   |
| 105 | <i>Eleutherodactylus</i><br>( <i>Euhyas</i> ) | <i>gundlachi</i>    | This study | USNM564994 | 190260 | EF493798 | EF493597 |          |          |  | X |   |
| 106 | <i>Eleutherodactylus</i><br>( <i>Euhyas</i> ) | <i>cf. varleyi</i>  | This study | MNHNCu1002 | 266765 | EF493345 |          | EF493408 | EF493467 |  | X | X |
| 107 | <i>Eleutherodactylus</i><br>( <i>Euhyas</i> ) | <i>intermedius</i>  | This study | USNM564996 | 190245 | EF493799 | EF493595 |          |          |  | X |   |
| 108 | <i>Eleutherodactylus</i><br>( <i>Euhyas</i> ) | <i>varleyi</i>      | This study | USNM335732 | 172529 | EF493800 | EF493596 |          |          |  | X |   |
| 109 | <i>Eleutherodactylus</i><br>( <i>Euhyas</i> ) | <i>pezopetrus</i>   | This study | USNM565004 | 190536 | EF493793 | EF493601 |          |          |  | X |   |
| 110 | <i>Eleutherodactylus</i><br>( <i>Euhyas</i> ) | <i>greyi</i>        | This study | USNM564991 | 172799 | EF493801 | EF493628 |          |          |  | X |   |
| 111 | <i>Eleutherodactylus</i><br>( <i>Euhyas</i> ) | <i>emiliae</i>      | This study | No voucher | 266680 | EF493368 | EF493638 |          |          |  | X |   |
| 112 | <i>Eleutherodactylus</i><br>( <i>Euhyas</i> ) | <i>dimidiatus</i>   | This study | USNM564986 | 190049 | EF493802 | EF493640 |          |          |  | X |   |
| 113 | <i>Eleutherodactylus</i><br>( <i>Euhyas</i> ) | <i>maestrensis</i>  | This study | MNHNCu1003 | 266593 | EF493369 | EF493639 |          |          |  | X |   |
| 114 | <i>Eleutherodactylus</i><br>( <i>Euhyas</i> ) | <i>albipes</i>      | This study | USNM564976 | 190449 | EF493386 |          | EF493409 | EF493475 |  | X | X |
| 115 | <i>Eleutherodactylus</i><br>( <i>Euhyas</i> ) | <i>schmidti</i>     | This study | USNM332313 | 161668 | EF493803 | EF493641 |          |          |  | X |   |
| 116 | <i>Eleutherodactylus</i><br>( <i>Euhyas</i> ) | <i>eunaster</i>     | This study | No voucher | 267897 | EF493804 | EF493646 |          |          |  | X |   |

|     |                                      |                         |                 |                   |               |                      |                      |          |          |   |   |
|-----|--------------------------------------|-------------------------|-----------------|-------------------|---------------|----------------------|----------------------|----------|----------|---|---|
| 117 | <i>Eleutherodactylus (Euhyas)</i>    | <i>caribe</i>           | This study      | USNM314179        | 191962        | EF493385             | EF493411             | EF493472 | x        | x | x |
| 118 | <i>Eleutherodactylus (Euhyas)</i>    | <i>corona</i>           | This study      | KU218431          | 192197        | EF493807             | EF493645             |          | x        |   |   |
| 119 | <i>Eleutherodactylus (Euhyas)</i>    | <i>heminota</i>         | This study      | USNM331829        | 267899        | EF493806             | EF493649             |          | x        |   |   |
| 120 | <i>Eleutherodactylus (Euhyas)</i>    | <i>amadeus</i>          | This study      | USNM329866        | 267898        | EF493805             | EF493644             |          | x        |   |   |
| 121 | <i>Eleutherodactylus (Euhyas)</i>    | <i>bakeri</i>           | This study      | USNM564981        | 104652        | EF493808             | EF493647             |          | x        |   |   |
| 122 | <i>Eleutherodactylus (Euhyas)</i>    | <i>glaphycompus</i>     | This study      | USNM292259        | 103958        | EF493383             |                      |          | x        | x |   |
| 123 | <i>Eleutherodactylus (Euhyas)</i>    | <i>dolomedes</i>        | This study      | KU218434          | 192109        | EF493809             | EF493648             |          | x        |   |   |
| 124 | <i>Eleutherodactylus (Euhyas)</i>    | <i>glanduliferoides</i> | This study      | USNM564989        | 160571        | EF493546             | EF493364             |          | x        |   |   |
| 125 | <i>Eleutherodactylus (Euhyas)</i>    | <i>thorectes</i>        | This study      | USNM565011        | 192230        | EF493384             | EF493416             | EF493473 | x        | x | x |
| 126 | <i>Eleutherodactylus (Euhyas)</i>    | <i>jugans</i>           | This study      | USNM331952        | 267901        | EF493810             | EF493652             |          | x        |   |   |
| 127 | <i>Eleutherodactylus (Euhyas)</i>    | <i>apostates</i>        | This study      | USNM564979        | 192240        | EF493811             | EF493650             |          | x        |   |   |
| 128 | <i>Eleutherodactylus (Euhyas)</i>    | <i>oxyrhynchus</i>      | This study      | USNM332073        | 267902        | EF493812             | EF493651             |          | x        |   |   |
| 129 | <i>Eleutherodactylus (Euhyas)</i>    | <i>ruffemorialis</i>    | This study      | No voucher        | 160226        | EF493813             | EF493653             |          | x        |   |   |
| 130 | <i>Eleutherodactylus (Euhyas)</i>    | <i>furcyensis</i>       | This study      | USNM331673        | 267903        | EF493814             | EF493654             |          | x        |   |   |
| 131 | <i>Eleutherodactylus (Euhyas)</i>    | <i>paulsoni</i>         | This study      | USNM310833        | 191998        | EF493815             | EF493659             |          | x        |   |   |
| 132 | <i>Eleutherodactylus (Euhyas)</i>    | <i>glandulifer</i>      | This study      | USNM564988        | 192074        | EF493816             | EF493655             |          | x        |   |   |
| 133 | <i>Eleutherodactylus (Euhyas)</i>    | <i>sciagraphus</i>      | This study      | USNM332316        | 103943        | EF493817             | EF493656             |          | x        |   |   |
| 134 | <i>Eleutherodactylus (Euhyas)</i>    | <i>ventrilineatus</i>   | This study      | USNM332320        | 267904        | EF493818             | EF493658             |          | x        |   |   |
| 135 | <i>Eleutherodactylus (Euhyas)</i>    | <i>brevirostris</i>     | This study      | USNM329968        | 267905        | EF493819             | EF493657             |          | x        |   |   |
| 136 | <i>Eleutherodactylus (Euhyas)</i>    | <i>zugi</i>             | This study      | USNM335744        | 172578        | EF493347             | EF493401             | EF493474 | x        | x | x |
| 137 | <i>Eleutherodactylus (Euhyas)</i>    | <i>klinikowskii</i>     | This study      | MNHNCu1004        | 266592        | EF493547             | EF493363             |          | x        |   |   |
| 138 | <i>Eleutherodactylus (Syrrophus)</i> | <i>marnockii</i>        | This study<br>2 | No voucher n/a    | 194156<br>n/a | EF493820<br>DQ283102 | EF493642<br>DQ283101 | EF493399 | EF493476 | x | x |
| 139 | <i>Eleutherodactylus (Syrrophus)</i> | <i>symingtoni</i>       | This study      | No voucher        | 172583        | EF493821             | EF493643             |          | x        |   |   |
| 140 | <i>Eleutherodactylus (Syrrophus)</i> | <i>zeus</i>             | This study      | USNM335740        | 172582        | EF493718             | EF493402             | EF493477 | EF493477 | x | x |
| 141 | <i>Barycholos</i>                    | <i>ternetzi</i>         | 2               | n/a               | n/a           | DQ283094             |                      | DQ284144 | x        | x | x |
| 142 | " <i>Eleutherodactylus</i> "         | <i>binotatus</i>        | This study<br>2 | USNM303077<br>n/a | 267339<br>n/a | EF493361             | EF493397             | DQ282918 | x        | x | x |
| 143 | <i>Craugastor</i>                    | <i>rhodopis</i>         | 2               | n/a               | n/a           | DQ283317             |                      |          | x        | x |   |
| 144 | <i>Craugastor</i>                    | <i>mexicanus</i>        | 3               | n/a               | n/a           | AY326006             |                      |          | x        | x |   |
| 145 | <i>Craugastor</i>                    | <i>podiciferus</i>      | This study      | MVZ12020          | 266082        | EF493360             | EF493450             | EF493481 | x        | x | x |
| 146 | <i>Craugastor</i>                    | <i>bransfordii</i>      | This study      | AMNH-<br>A124398  | 267852        | EF493822             | EF493661             |          | x        |   |   |
| 147 | <i>Craugastor</i>                    | <i>longirostris</i>     | This study      | KU177803          | 267853        | EF493395             | EF493454             | EF493482 | x        | x | x |

|     |                              |                       |            |            |         |         |                   |          |          |   |   |   |
|-----|------------------------------|-----------------------|------------|------------|---------|---------|-------------------|----------|----------|---|---|---|
| 148 | <i>Craugastor</i>            | <i>fitzingeri</i>     | 3          | n/a        | n/a     | n/a     | AY326001          |          |          | X | X | X |
| 149 | <i>Craugastor</i>            | <i>sandersoni</i>     | This study | UTA-A49803 | 267854  | 267854  | EF493712          |          |          | X | X | X |
| 150 | <i>Craugastor</i>            | <i>punctariolus</i>   | 2          | n/a        | n/a     | n/a     | DQ283168          |          |          | X | X | X |
| 151 | <i>Craugastor</i>            | <i>pygmaeus</i>       | This study | UTA-A55241 | 267855  | 267855  | EF493711          | EF493451 | EF493479 | X | X | X |
| 152 | <i>Craugastor</i>            | <i>montanus</i>       | This study | UTA-A51105 | 267888  | 267888  | EF493530          | EF493453 | EF493478 | X | X | X |
| 153 | <i>Craugastor</i>            | <i>augusti</i>        | 2          | n/a        | n/a     | n/a     | DQ283271          |          |          | X | X | X |
| 154 | <i>Craugastor</i>            | <i>bocourti</i>       | This study | UTA-A55235 | 267856  | 267856  | EF493713          |          |          | X | X | X |
| 155 | <i>Craugastor</i>            | <i>alfredi</i>        | 2          | n/a        | n/a     | n/a     | DQ283318          |          |          | X | X | X |
| 156 | <i>Craugastor</i>            | <i>daryi</i>          | This study | UTA-A57940 | 267858  | 267858  | EF493531          | EF493452 | EF493480 | X | X | X |
| 157 | <i>Brachycephalus</i>        | <i>ephippium</i>      | 3, 2       | n/a n/a    | n/a n/a | n/a n/a | AY326008 DQ283091 |          | DQ282917 | X | X | X |
| 158 | " <i>Phrynopus</i> "         | <i>peraccai</i>       | This study | KU178266   | 267859  | 267859  | EF493710          | EF493420 | EF493485 | X | X | X |
| 159 | " <i>Phrynopus</i> "         | <i>brunneus</i>       | This study | KU178258   | 267860  | 267860  | EF493357          | EF493422 | EF493484 | X | X | X |
| 160 | " <i>Eleutherodactylus</i> " | <i>elassodiscus</i>   | This study | KU177282   | 267861  | 267861  | EF493358          |          |          | X | X | X |
| 161 | " <i>Eleutherodactylus</i> " | <i>dolops</i>         | This study | No voucher | 267862  | 267862  | EF493394          | EF493414 | EF493483 | X | X | X |
| 162 | <i>Pristimantis</i>          | <i>walkeri</i>        | This study | KU218116   | 267231  | 267231  | EF493518          | EF493428 | EF493490 | X | X | X |
| 163 | <i>Pristimantis</i>          | <i>luteolateralis</i> | This study | KU177807   | 267863  | 267863  | EF493517          |          |          | X | X | X |
| 164 | <i>Pristimantis</i>          | <i>parvillus</i>      | This study | KU177821   | 267864  | 267864  | EF493351          |          |          | X | X | X |
| 165 | <i>Pristimantis</i>          | <i>chalceus</i>       | This study | KU177638   | 267865  | 267865  | EF493675          |          |          | X | X | X |
| 166 | <i>Pristimantis</i>          | <i>ockendeni</i>      | This study | KU222023   | 267253  | 267253  | EF493519          | EF493434 | EF493496 | X | X | X |
| 167 | <i>Pristimantis</i>          | <i>unistrigatus</i>   | This study | KU218057   | 267227  | 267227  | EF493387          | EF493444 | EF493505 | X | X | X |
| 168 | <i>Pristimantis</i>          | <i>cajamarcensis</i>  | This study | KU217845   | 267211  | 267211  | EF493823 EF493663 |          |          | X | X | X |
| 169 | <i>Pristimantis</i>          | <i>ceuthospilus</i>   | This study | KU 212216  | 267198  | 267198  | EF493520          |          |          | X | X | X |
| 170 | <i>Pristimantis</i>          | <i>lirellus</i>       | This study | KU212226   | 267200  | 267200  | EF493521          |          |          | X | X | X |
| 171 | <i>Pristimantis</i>          | <i>imitatrix</i>      | This study | KU215476   | 267205  | 267205  | EF493824 EF493667 |          |          | X | X | X |
| 172 | <i>Pristimantis</i>          | <i>croceinguinis</i>  | This study | KU217862   | 267213  | 267213  | EF493669 EF493665 |          |          | X | X | X |
| 173 | <i>Pristimantis</i>          | <i>altamazonicus</i>  | This study | KU215460   | 267204  | 267204  | EF493670          | EF493441 |          | X | X | X |
| 174 | <i>Pristimantis</i>          | <i>orestes</i>        | This study | KU218257   | 267249  | 267249  | EF493388          |          |          | X | X | X |
| 175 | <i>Pristimantis</i>          | <i>simonbolivari</i>  | This study | KU218254   | 267248  | 267248  | EF493671          |          |          | X | X | X |
| 176 | <i>Pristimantis</i>          | <i>riveti</i>         | This study | KU218035   | 267224  | 267224  | EF493348          |          |          | X | X | X |
| 177 | <i>Pristimantis</i>          | <i>versicolor</i>     | This study | KU218096   | 267228  | 267228  | EF493389          | EF493431 | EF493493 | X | X | X |
| 178 | <i>Pristimantis</i>          | <i>phoxocephalus</i>  | This study | KU218025   | 267222  | 267222  | EF493349          |          |          | X | X | X |
| 179 | <i>Pristimantis</i>          | <i>spinosus</i>       | This study | KU218052   | 267225  | 267225  | EF493673          |          |          | X | X | X |
| 180 | <i>Pristimantis</i>          | <i>cryophilus</i>     | This study | KU217863   | 267214  | 267214  | EF493672          |          |          | X | X | X |
| 181 | <i>Pristimantis</i>          | <i>rhodoplichus</i>   | This study | KU219788   | 267250  | 267250  | EF493674          |          |          | X | X | X |
| 182 | <i>Pristimantis</i>          | <i>wiensi</i>         | This study | KU219796   | 267251  | 267251  | EF493377 EF493668 |          |          | X | X | X |

|     |                     |                       |               |                    |               |          |          |          |  |   |   |
|-----|---------------------|-----------------------|---------------|--------------------|---------------|----------|----------|----------|--|---|---|
| 183 | <i>Pristimantis</i> | <i>petrobarbus</i>    | This study    | KU212293           | 267202        | EF493825 | EF493367 |          |  | X |   |
| 184 | <i>Pristimantis</i> | <i>melanogaster</i>   | This study    | MHNSM-<br>WED56846 | 267438        | EF493826 | EF493664 |          |  | X |   |
| 185 | <i>Pristimantis</i> | <i>simonsii</i>       | 4             | n/a                | n/a           | AM039709 | AM039641 |          |  | X |   |
| 186 | <i>Pristimantis</i> | <i>appendiculatus</i> | This study    | KU177637           | 267866        | EF493524 |          |          |  | X | X |
| 187 | <i>Pristimantis</i> | <i>pyncodermis</i>    | This study    | KU218028           | 267223        | EF493680 |          |          |  | X | X |
| 188 | <i>Pristimantis</i> | <i>dissimulatus</i>   | This study    | KU179090           | 267867        | EF493522 |          |          |  | X | X |
| 189 | <i>Pristimantis</i> | <i>calcarulatus</i>   | This study    | KU177658           | 267868        | EF493523 |          |          |  | X | X |
| 190 | <i>Pristimantis</i> | <i>orcei</i>          | This study    | KU218021           | 267221        | EF493679 |          |          |  | X | X |
| 191 | <i>Pristimantis</i> | <i>glandulosus</i>    | This study    | KU218002           | 267217        | EF493676 |          |          |  | X | X |
| 192 | <i>Pristimantis</i> | <i>inuitatus</i>      | This study    | KU218015           | 267218        | EF493677 |          |          |  | X | X |
| 193 | <i>Pristimantis</i> | <i>acerus</i>         | This study    | KU217786           | 267207        | EF493678 |          |          |  | X | X |
| 194 | <i>Pristimantis</i> | <i>schultei</i>       | This study    | KU212220           | 267199        | EF493681 |          |          |  | X | X |
| 195 | <i>Pristimantis</i> | <i>bromeliaceus</i>   | This study    | KU291702           | 171051        | EF493351 |          |          |  | X | X |
| 196 | <i>Pristimantis</i> | <i>subsigillatus</i>  | This study    | KU218147           | 267246        | EF493525 |          |          |  | X | X |
| 197 | <i>Pristimantis</i> | <i>nyctophylax</i>    | This study    | KU177812           | 267869        | EF493526 | EF493425 | EF493487 |  | X | X |
| 198 | <i>Pristimantis</i> | <i>shrevei</i>        | This study    | No voucher         | 266036        | EF493692 |          |          |  | X | X |
| 199 | <i>Pristimantis</i> | <i>euphronides</i>    | This study    | BWMC6918           | 266624        | EF493527 | EF493427 | EF493489 |  | X | X |
| 200 | <i>Pristimantis</i> | <i>rozei</i>          | This study    | No voucher         | 102308        | EF493691 | EF493429 | EF493491 |  | X | X |
| 201 | <i>Pristimantis</i> | <i>gentryi</i>        | This study    | KU218109           | 267230        | EF493511 |          |          |  | X | X |
| 202 | <i>Pristimantis</i> | <i>truebae</i>        | This study    | KU218013           | 267229        | EF493512 |          |          |  | X | X |
| 203 | <i>Pristimantis</i> | <i>curtipes</i>       | This study    | KU217871           | 267215        | EF493513 | EF493435 | EF493497 |  | X | X |
| 204 | <i>Pristimantis</i> | <i>vertebralis</i>    | This study    | KU177972           | 267870        | EF493689 |          |          |  | X | X |
| 205 | <i>Pristimantis</i> | <i>bucklei</i>        | This study    | KU217836           | 267210        | EF493350 |          |          |  | X | X |
| 206 | <i>Pristimantis</i> | <i>devillei</i>       | This study    | KU217991           | 267216        | EF493688 |          |          |  | X | X |
| 207 | <i>Pristimantis</i> | <i>surdus</i>         | This study    | KU177847           | 267871        | EF493687 |          |          |  | X |   |
| 208 | <i>Pristimantis</i> | <i>quinquagesimus</i> | This study    | KU179374           | 267872        | EF493690 |          |          |  | X | X |
| 209 | <i>Pristimantis</i> | <i>duellmani</i>      | 3, This study | n/a KU217998       | n/a<br>267444 | AY326003 | EF493438 | EF493500 |  | X | X |
| 210 | <i>Pristimantis</i> | <i>thymalopsoides</i> | This study    | KU177861           | 267873        | EF493514 |          |          |  | X | X |
| 211 | <i>Pristimantis</i> | <i>ocreatus</i>       | This study    | KU208508           | 267439        | EF493682 |          |          |  | X | X |
| 212 | <i>Pristimantis</i> | <i>pyrrhomerus</i>    | This study    | KU218030           | 267441        | EF493683 |          |          |  | X | X |
| 213 | <i>Pristimantis</i> | <i>festae</i>         | This study    | KU218234           | 267247        | EF493515 |          |          |  | X | X |
| 214 | <i>Pristimantis</i> | <i>leoni</i>          | This study    | KU218227           | 267437        | EF493684 | EF493433 | EF493495 |  | X | X |
| 215 | <i>Pristimantis</i> | <i>verecundus</i>     | This study    | QCAZ12410          | 267646        | EF493686 |          |          |  | X | X |

|     |                     |                       |            |                     |        |                     |          |          |   |   |   |
|-----|---------------------|-----------------------|------------|---------------------|--------|---------------------|----------|----------|---|---|---|
| 216 | <i>Pristimantis</i> | <i>celator</i>        | This study | KU177684            | 267874 | EF493685            |          |          | X | X | X |
| 217 | <i>Pristimantis</i> | <i>chloronotus</i>    | 3          | n/a                 | n/a    | AY326007            |          |          | X | X | X |
| 218 | <i>Pristimantis</i> | <i>thymelensis</i>    | This study | QCAZ16428           | 267644 | EF493516            | EF493442 | EF493503 | X | X | X |
| 219 | <i>Pristimantis</i> | <i>supernatis</i>     | 3          | n/a                 | n/a    | AY326005            |          |          | X | X | X |
| 220 | <i>Pristimantis</i> | <i>sp. 1</i>          | 3          | n/a                 | n/a    | AY326002            |          |          | X | X | X |
| 221 | <i>Pristimantis</i> | <i>urichi</i>         | This study | USNM336098          | 101646 | EF493699            | EF493426 | EF493488 | X | X | X |
| 222 | <i>Pristimantis</i> | <i>latidiscus</i>     | This study | KU218016            | 267219 | EF493698            |          |          | X | X | X |
| 223 | <i>Pristimantis</i> | <i>colomai</i>        | This study | QCAZ17101           | 267635 | EF493354            | EF493440 | EF493502 | X | X | X |
| 224 | <i>Pristimantis</i> | <i>cruentus</i>       | This study | AMNH-<br>A12444-448 | 267876 | EF493697            |          |          | X | X | X |
| 225 | <i>Pristimantis</i> | <i>ridens</i>         | This study | AMNH-<br>A124551    | 267877 | EF493355            |          |          | X | X | X |
| 226 | <i>Pristimantis</i> | <i>cremnobates</i>    | This study | KU177252            | 267878 | EF493528            | EF493424 | EF493486 | X | X | X |
| 227 | <i>Pristimantis</i> | <i>w-nigrum</i>       | 3          | n/a                 | n/a    | AY326004            |          |          | X | X | X |
| 228 | <i>Pristimantis</i> | <i>acties</i>         | This study | KU217830            | 267209 | EF493696            | EF493432 | EF493494 | X | X | X |
| 229 | <i>Pristimantis</i> | <i>lanthanites</i>    | This study | KU222001            | 267252 | EF493695            |          |          | X | X | X |
| 230 | <i>Pristimantis</i> | <i>crenunguis</i>     | This study | KU177730            | 267879 | EF493693   EF493666 |          |          | X | X | X |
| 231 | <i>Pristimantis</i> | <i>labiosus</i>       | This study | QCAZ19771           | 267640 | EF493694            |          |          | X | X | X |
| 232 | <i>Pristimantis</i> | <i>sp. 2</i>          | This study | MHNSM-<br>LR4341    | 266049 | EF493356            |          |          | X | X | X |
| 233 | <i>Pristimantis</i> | <i>conspicillatus</i> | This study | QCAZ28448           | 267636 | EF493529            | EF493437 | EF493499 | X | X | X |
| 234 | <i>Pristimantis</i> | <i>condor</i>         | This study | KU217857            | 267212 | EF493701            | EF493443 | EF493504 | X | X | X |
| 235 | <i>Pristimantis</i> | <i>citriogaster</i>   | This study | KU212278            | 267201 | EF493700            |          |          | X | X | X |
| 236 | <i>Pristimantis</i> | <i>achatinus</i>      | This study | KU217809            | 267208 | EF493827   EF493660 |          |          | X | X | X |
| 237 | <i>Pristimantis</i> | <i>lymani</i>         | This study | KU218019            | 267220 | EF493392            |          |          | X | X | X |
| 238 | <i>Pristimantis</i> | <i>fenestratus</i>    | This study | MHNSM9298           | 266046 | EF493703            |          |          | X | X | X |
| 239 | <i>Pristimantis</i> | <i>bipunctatus</i>    | This study | KU291638            | 171021 | EF493702            | EF493430 | EF493492 | X | X | X |
| 240 | <i>Pristimantis</i> | <i>skydmainos</i>     | This study | MHNSM10071          | 266052 | EF493393            |          |          | X | X | X |
| 241 | <i>Pristimantis</i> | <i>toftae</i>         | This study | KU215493            | 267206 | EF493353            |          |          | X | X | X |
| 242 | <i>Pristimantis</i> | <i>rhabdolaemus</i>   | This study | KU173492            | 267875 | EF493706            |          |          | X | X | X |
| 243 | <i>Pristimantis</i> | <i>pluvicanorus</i>   | 5          | n/a                 | n/a    | AY843586            |          |          | X | X | X |
| 244 | <i>Pristimantis</i> | <i>sagittulus</i>     | This study | KU291635            | 171098 | EF493705            | EF493439 | EF493501 | X | X | X |
| 245 | <i>Pristimantis</i> | <i>stictogaster</i>   | This study | KU291659            | 171080 | EF493704            | EF493445 | EF493506 | X | X | X |
| 246 | <i>Pristimantis</i> | <i>aniptopalmatum</i> | This study | KU291627            | 171070 | EF493390            |          |          | X | X | X |
| 247 | <i>Pristimantis</i> | <i>peruvianus</i>     | This study | MHNSM9267           | 266050 | EF493707            | EF493436 | EF493498 | X | X | X |

|     |                     |                     |               |                     |               |                      |                      |          |          |   |   |     |
|-----|---------------------|---------------------|---------------|---------------------|---------------|----------------------|----------------------|----------|----------|---|---|-----|
| 248 | <i>Pristimantis</i> | <i>caprifer</i>     | This study    | KU177680            | 267880        | EF493391             |                      |          |          | X | X | X   |
| 249 | <i>Oreobates</i>    | <i>quixensis</i>    | This study, 6 | KU178249-250<br>n/a | 267881<br>n/a | EF493828<br>AY819344 | EF493662<br>AY819474 |          |          | X | X | X   |
| 250 | <i>Oreobates</i>    | <i>sp.</i>          | 2             | n/a                 | n/a           | DQ283060             | DQ283061             |          |          | X |   |     |
| 251 | <i>Phrynopus</i>    | <i>parkeri</i>      | 4             | n/a                 | n/a           | AM039707             | AM039639             |          |          | X |   |     |
| 252 | <i>Phrynopus</i>    | <i>juninensis</i>   | 4             | n/a                 | n/a           | AM039725             | AM039657             |          |          | X |   |     |
| 253 | <i>Phrynopus</i>    | <i>kauneorum</i>    | 4             | n/a                 | n/a           | AM039718             | AM039650             |          |          | X |   |     |
| 254 | <i>Phrynopus</i>    | <i>tautzorum</i>    | 4             | n/a                 | n/a           | AM039720             | AM039652             |          |          | X |   |     |
| 255 | <i>Phrynopus</i>    | <i>barthlenae</i>   | 4             | n/a                 | n/a           | AM039717             | AM039649             |          |          | X |   |     |
| 256 | <i>Phrynopus</i>    | <i>horstpauli</i>   | 4             | n/a                 | n/a           | AM039715             | AM039647             |          |          | X |   |     |
| 257 | <i>Phrynopus</i>    | <i>pesantesi</i>    | 4             | n/a                 | n/a           | AM039724             | AM039656             |          |          | X |   |     |
| 258 | <i>Phrynopus</i>    | <i>bufoides</i>     | 4             | n/a                 | n/a           | AM039713             | AM039645             |          |          | X |   |     |
| 259 | <i>Phrynopus</i>    | <i>heimorum</i>     | 4             | n/a                 | n/a           | AM039703             | AM039635             |          |          | X |   |     |
| 260 | <i>Phrynopus</i>    | <i>bracki</i>       | This study    | USNM286919          | 171045        | EF493709             |                      | EF493421 | EF493507 | X | X | X   |
| 261 | <i>Phrynopus</i>    | <i>sp. 1</i>        | This study    | KU291634            | 171082        | EF493708             |                      |          |          | X | X |     |
| 262 | <i>Phrynopus</i>    | <i>cophites</i>     | This study    | KU173497            | 267882        | EF493537             |                      | EF493423 | EF493508 | X | X | X   |
| 263 | <i>Phrynopus</i>    | <i>iatamasi</i>     | 4             | n/a                 | n/a           | AM039712             | AM039644             |          |          | X |   |     |
| 264 | <i>Phrynopus</i>    | <i>wettsteini</i>   | 4             | n/a                 | n/a           | AM039711             | AM039643             |          |          | X |   |     |
| 265 | <i>Phrynopus</i>    | <i>sp. 2</i>        | 4             | n/a                 | n/a           | AM039710             | AM039642             |          |          | X |   |     |
| 266 | <i>Phrynopus</i>    | <i>sp. 3</i>        | 5             | n/a                 | n/a           | AY843720             |                      |          |          | X |   |     |
| 267 | <i>Phrynopus</i>    | <i>peruvianus</i>   | This study    | KU173495            | 267889        | EF493714             |                      |          |          | X | X |     |
| 268 | <i>Phyllonastes</i> | <i>sp.</i>          | 4             | n/a                 | n/a           | AM039714             | AM039646             |          |          | X |   |     |
| 269 | <i>Holoaden</i>     | <i>bradei</i>       | This study    | USNM207945          | 267883        | EF493378             | EF493366             | EF493449 |          | X | X |     |
| 270 | <i>Linnophys</i>    | <i>anomalous</i>    | This study    | KU177627            | 267884        | EF493534             |                      | EF493447 |          | X | X | x/2 |
| 271 | <i>Linnophys</i>    | <i>bufoniformis</i> | 2             | n/a                 | n/a           | DQ283165             |                      |          | DQ282942 | X | X | x/2 |
| 272 | <i>Linnophys</i>    | <i>necerus</i>      | This study    | KU179076            | 267885        | EF493535             |                      |          |          | X | X |     |
| 273 | <i>Linnophys</i>    | <i>sulcatus</i>     | This study    | KU218055            | 267226        | EF493536             |                      |          |          | X | X |     |
| 274 | <i>Ischnocnema</i>  | <i>guentheri</i>    | This study    | No voucher          | 267345        | EF493533             |                      | EF493407 | EF493510 | X | X | X   |
| 275 | <i>Ischnocnema</i>  | <i>hoehnei</i>      | This study    | No voucher          | 267886        | EF493359             |                      |          |          | X |   |     |
| 276 | <i>Ischnocnema</i>  | <i>parva</i>        | This study    | No voucher          | 267328        | EF493532             |                      | EF493400 | EF493509 | X | X | X   |
| 277 | <i>Ischnocnema</i>  | <i>juipoca</i>      | 2             | n/a                 | n/a           | DQ283093             |                      |          |          | X | X |     |
| 278 | <i>Litoria</i>      | <i>caerulea</i>     | 5, This study | n/a No voucher      | n/a<br>267887 | AY843692             |                      | EF493446 | AY844131 | X | X | X   |

|     |                        |                      |                                          |                    |                |                 |          |          |   |   |   |
|-----|------------------------|----------------------|------------------------------------------|--------------------|----------------|-----------------|----------|----------|---|---|---|
| 279 | <i>Agalychnis</i>      | <i>callidryas</i>    | 2, D. Cannatella, personal communication | n/a n/a            | n/a n/a        | DQ283423        | EF493362 | DQ283018 | x | x | x |
| 280 | <i>Rana</i>            | <i>catesbeiana</i>   | 7, This study, 2                         | n/a No voucher n/a | n/a 266591 n/a | M57527 DQ283257 | EF493448 | DQ282959 | x | x | x |
| n/a | <i>Bufo</i>            | <i>melanostictus</i> | 8                                        | n/a                | n/a            | AY458592        |          |          |   | x |   |
| n/a | <i>Centrolene</i>      | <i>prosoblepon</i>   | 5                                        | n/a                | n/a            | AY843574        |          |          |   | x |   |
| n/a | <i>Ceratophrys</i>     | <i>cornuta</i>       | 3                                        | n/a                | n/a            | AY326014        |          |          |   | x |   |
| n/a | <i>Cryptobatrachus</i> | <i>sp.</i>           | 3                                        | n/a                | n/a            | AY326050        |          |          |   | x |   |
| n/a | <i>Dendrobates</i>     | <i>sylvaticus</i>    | 9                                        | n/a                | n/a            | AY364569        |          |          |   | x |   |
| n/a | <i>Hyla</i>            | <i>chinensis</i>     | 8                                        | n/a                | n/a            | AY458593        |          |          |   | x |   |
| n/a | <i>Leptodactylus</i>   | <i>pentadactylus</i> | 3                                        | n/a                | n/a            | AY326017        |          |          |   | x |   |

For each specimen, source, GenBank accession no., data sets in which species appear, museum voucher and tissue collection number (if sequence generated by the authors) are reported. Museum abbreviations are AMNH (American Museum of Natural History; prefix "A" refers to amphibians), BWMC (Bobby Witche Memorial Collection, Avila University), KU (University of Kansas Museum of Natural History), MNHNCu (National Museum of Natural History, Havana, Cuba), MVZ (Museum of Vertebrate Zoology, University of California, Berkeley), QCAZ (Catholic University of Ecuador, Museum of Zoology), UPRRP (University of Puerto Rico, at Rio Piedras, Museum of Natural History), USNM (United States National Museum of Natural History, Smithsonian Institution), UTA (University of Texas at Arlington, Museum of Natural History), MHNSM (Universidad Nacional Mayor de San Marcos, Lima, Peru). Specimens are numbered as they appear in Fig. 2.

1. Feller AE, Hedges SB (1998) *Mol Phylogenet Evol* 9:509-516.
2. Frost DR, Grant T, Faivovich J, Bain RH, Haas A, Haddad CFB, De Sa RO, Channing A, Wilkinson M, Donnellan SC, et al. (2006) *Bull Am Mus Nat Hist* 297:1-371.
3. Darst CR, Cannatella DC (2004) *Mol Phylogenet Evol* 31:462-475.
4. Lehr E, Frittsch G, Muller A (2005) *Zool Scr* 34:593-603.
5. Faivovich J, Haddad CFB, Garcia PCA, Frost DR, Campbell JA, Wheeler WC (2005) *Bull Am Mus Nat Hist* 294:1-240.
6. Wiens JJ, Fetzner JW, Parkinson CL, Reeder TW (2005) *Syst Biol* 54:719-748.
7. Nagae, Y. (1988) *J. Nippon Med. Sch.* **55**, 417-430.
8. Zhang, P., Zhou, H., Chen, Y. Q., Liu, Y. F. & Qu, L. H. (2005) *Syst Biol* **54**, 391-400.
9. Santos, J. C., Coloma, L. A., & Cannatella, D. C. (2003) *Proc Natl Acad Sci U.S.A.* **100**, 12792-12797.
