# Supplementary material
Source: PubMed Central journal article supplement (PMC1891260)

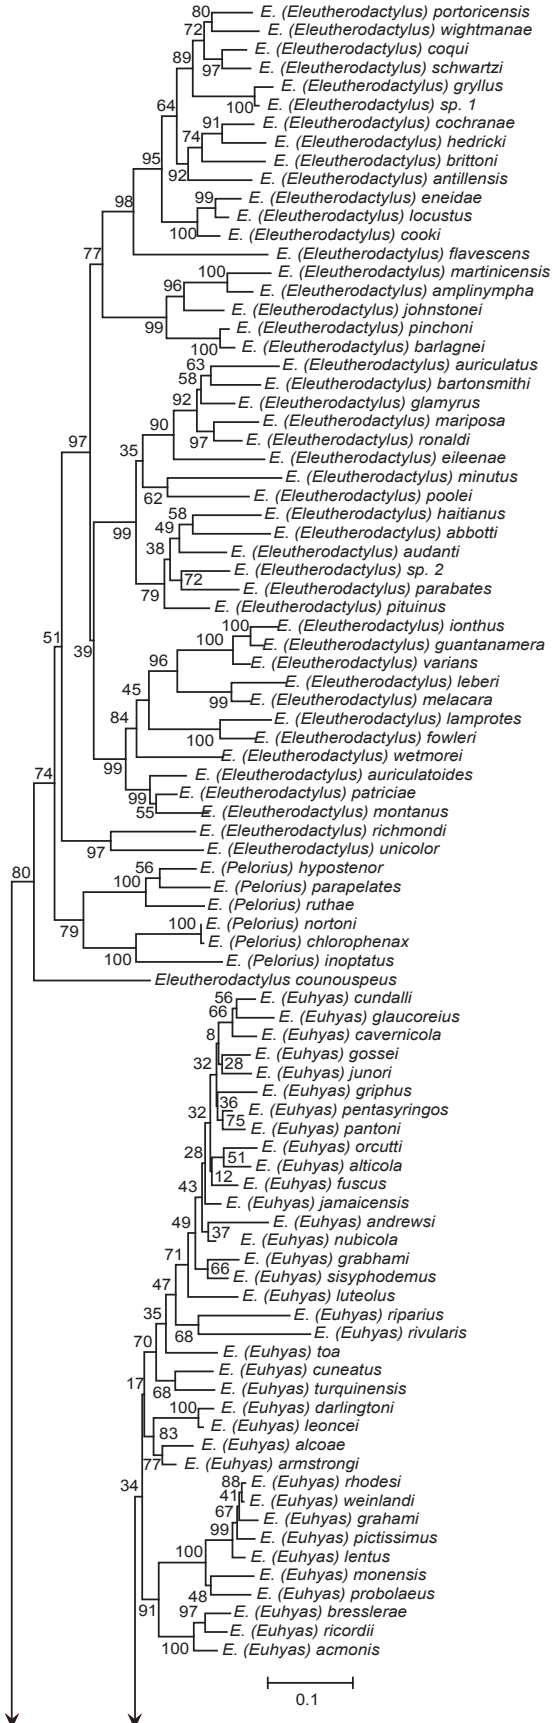

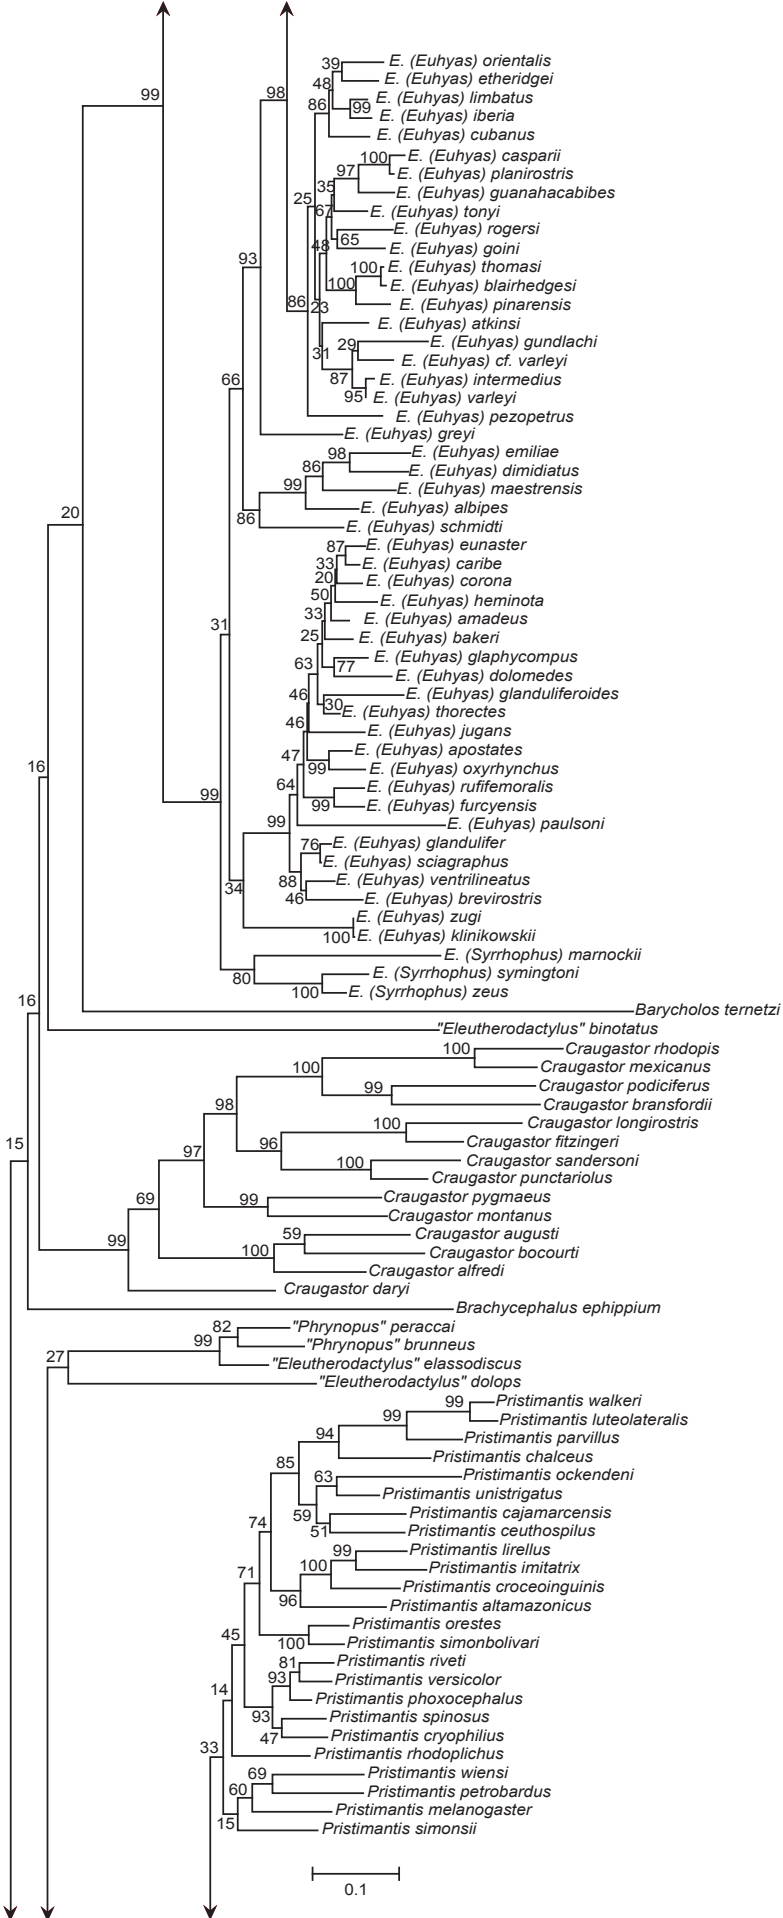

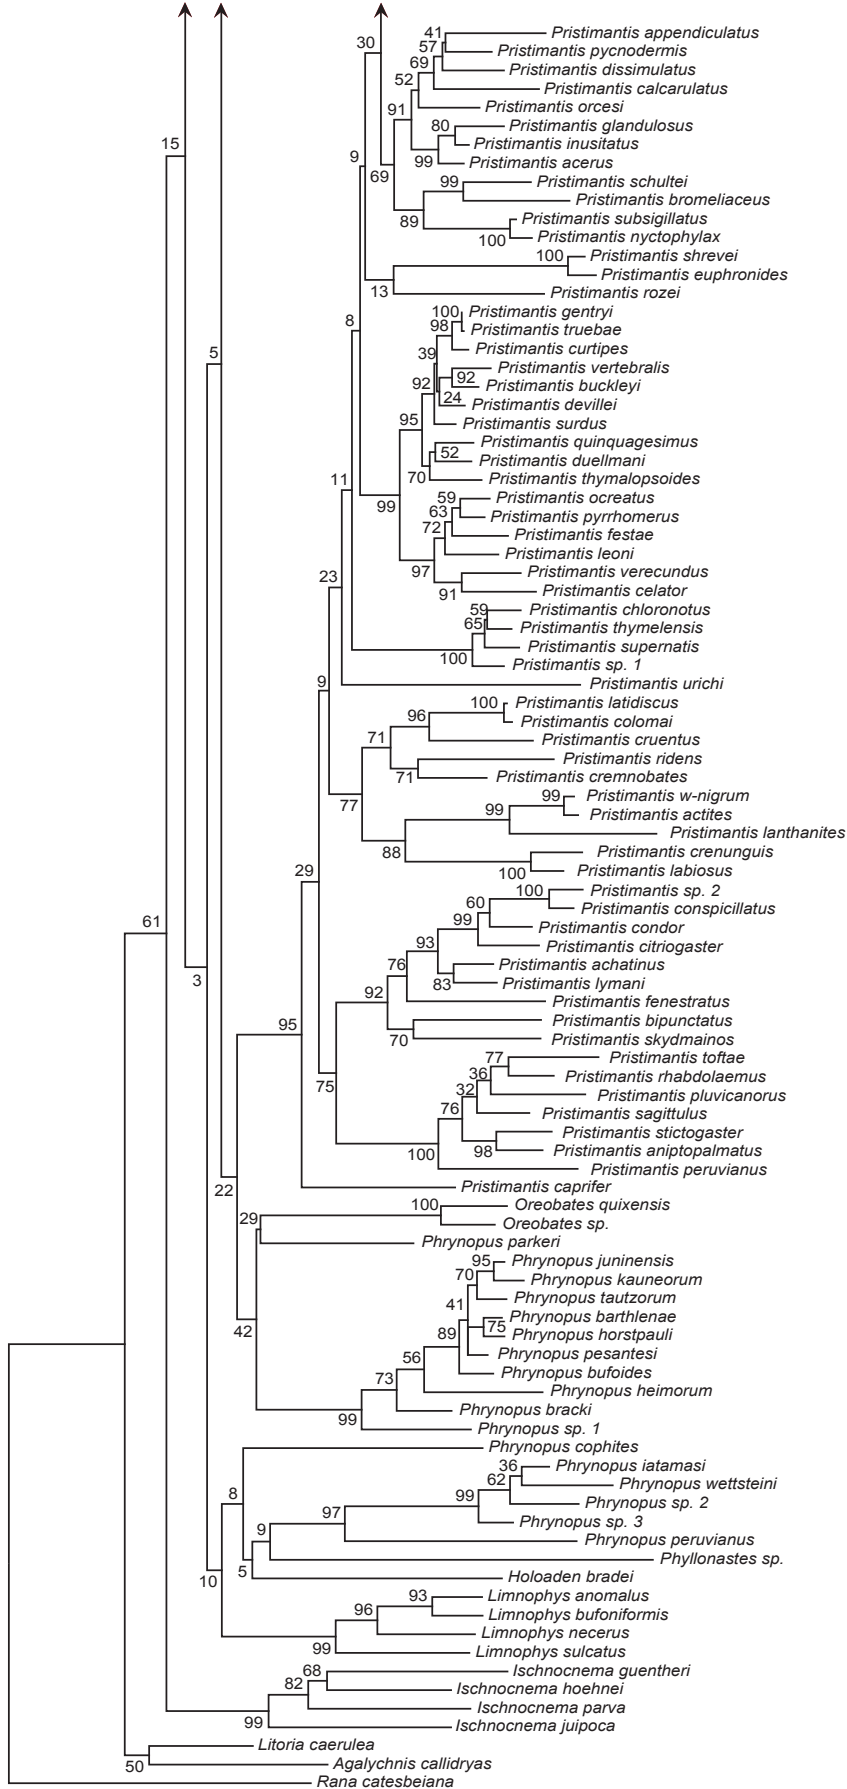

0.1

Supplement: pnas_0611051104_1.pdf [file pnas_0611051104_1.pdf]

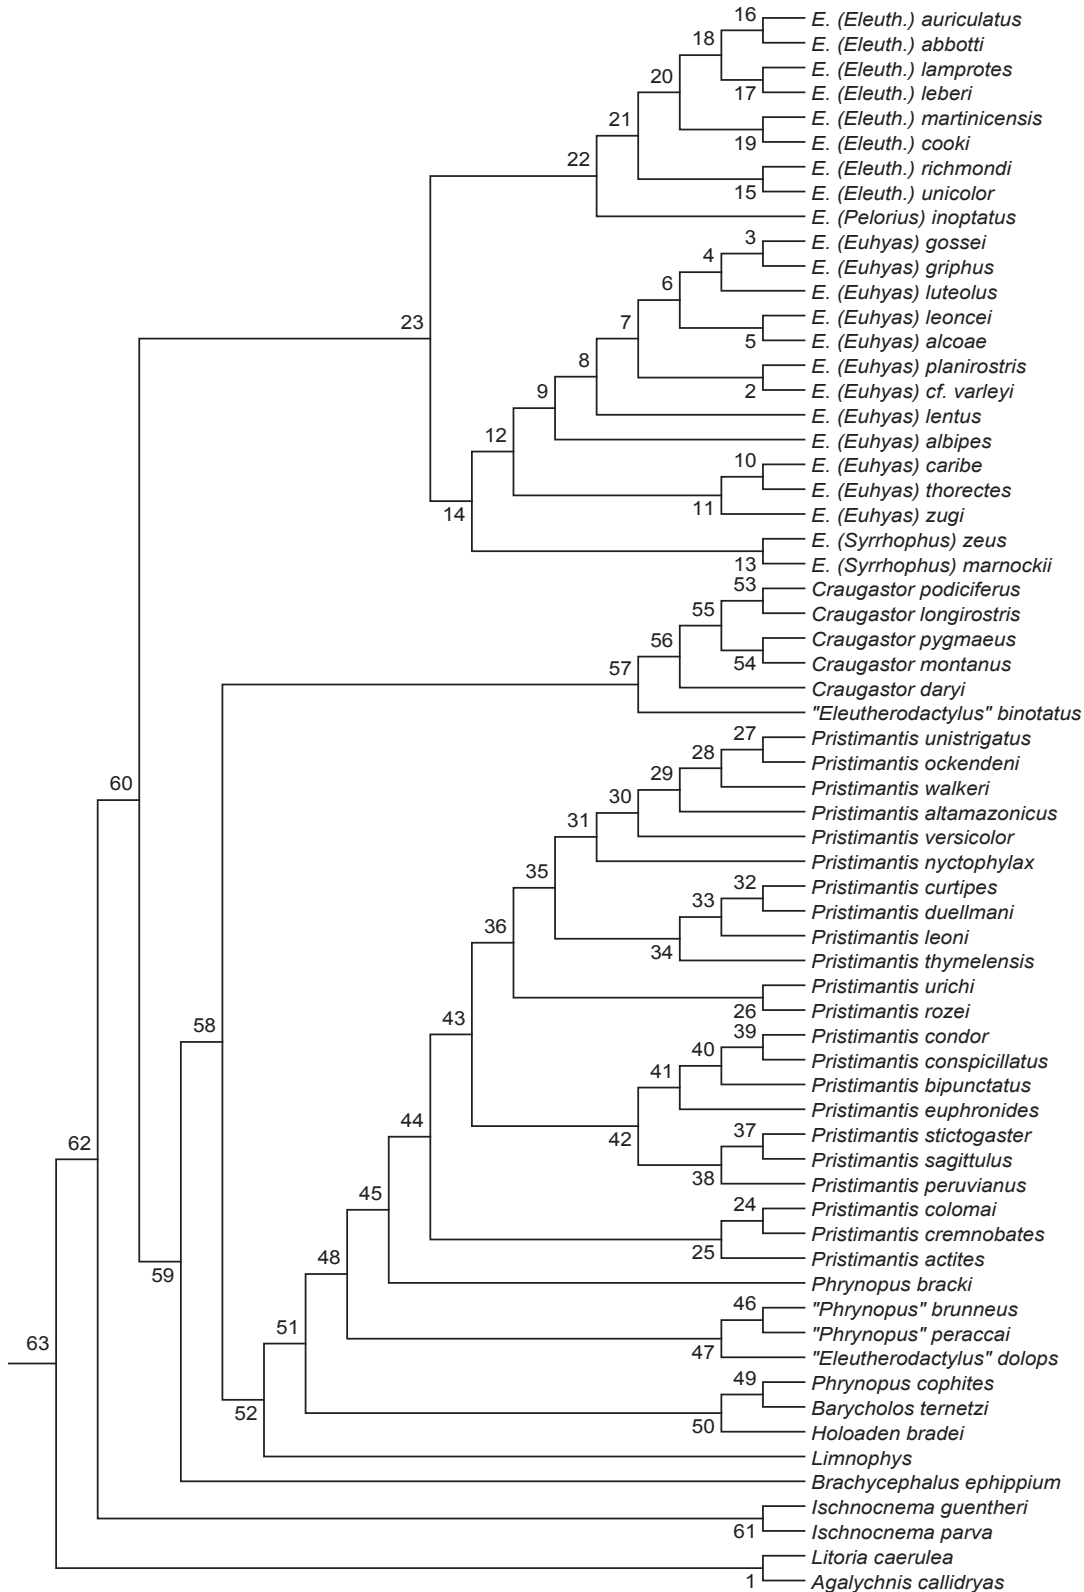

Supplement: pnas_0611051104_10.pdf [file pnas_0611051104_10.pdf]

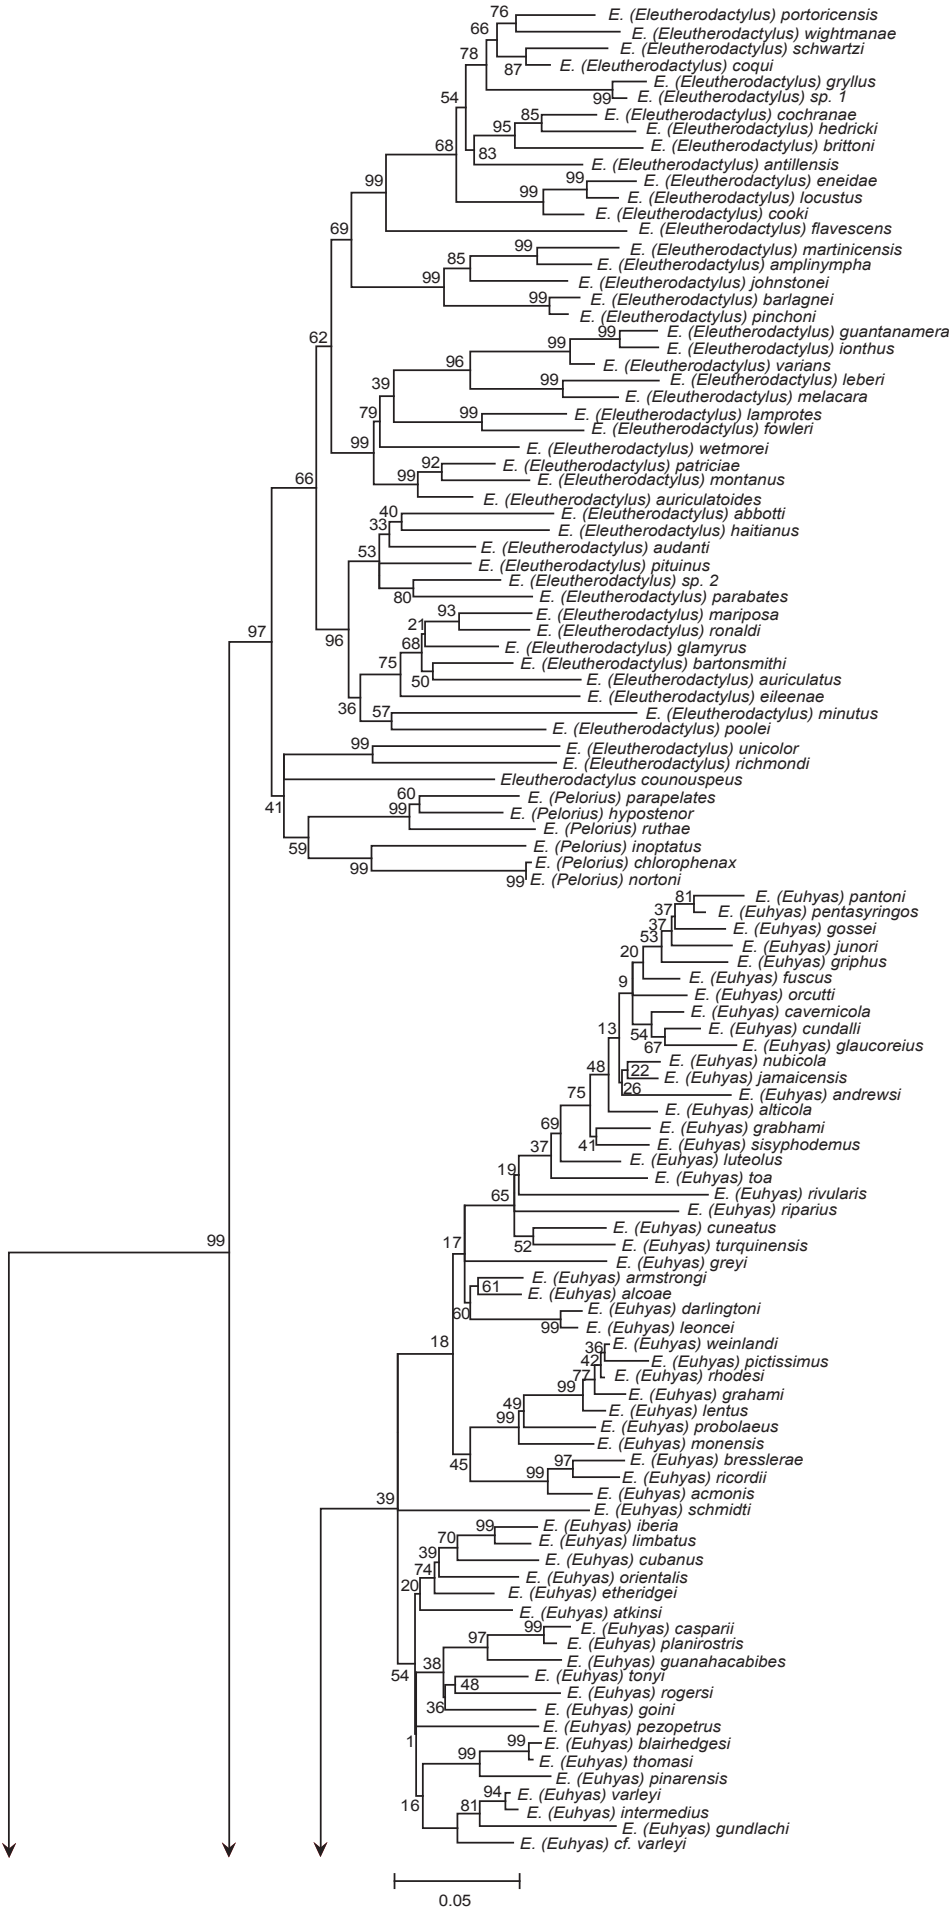

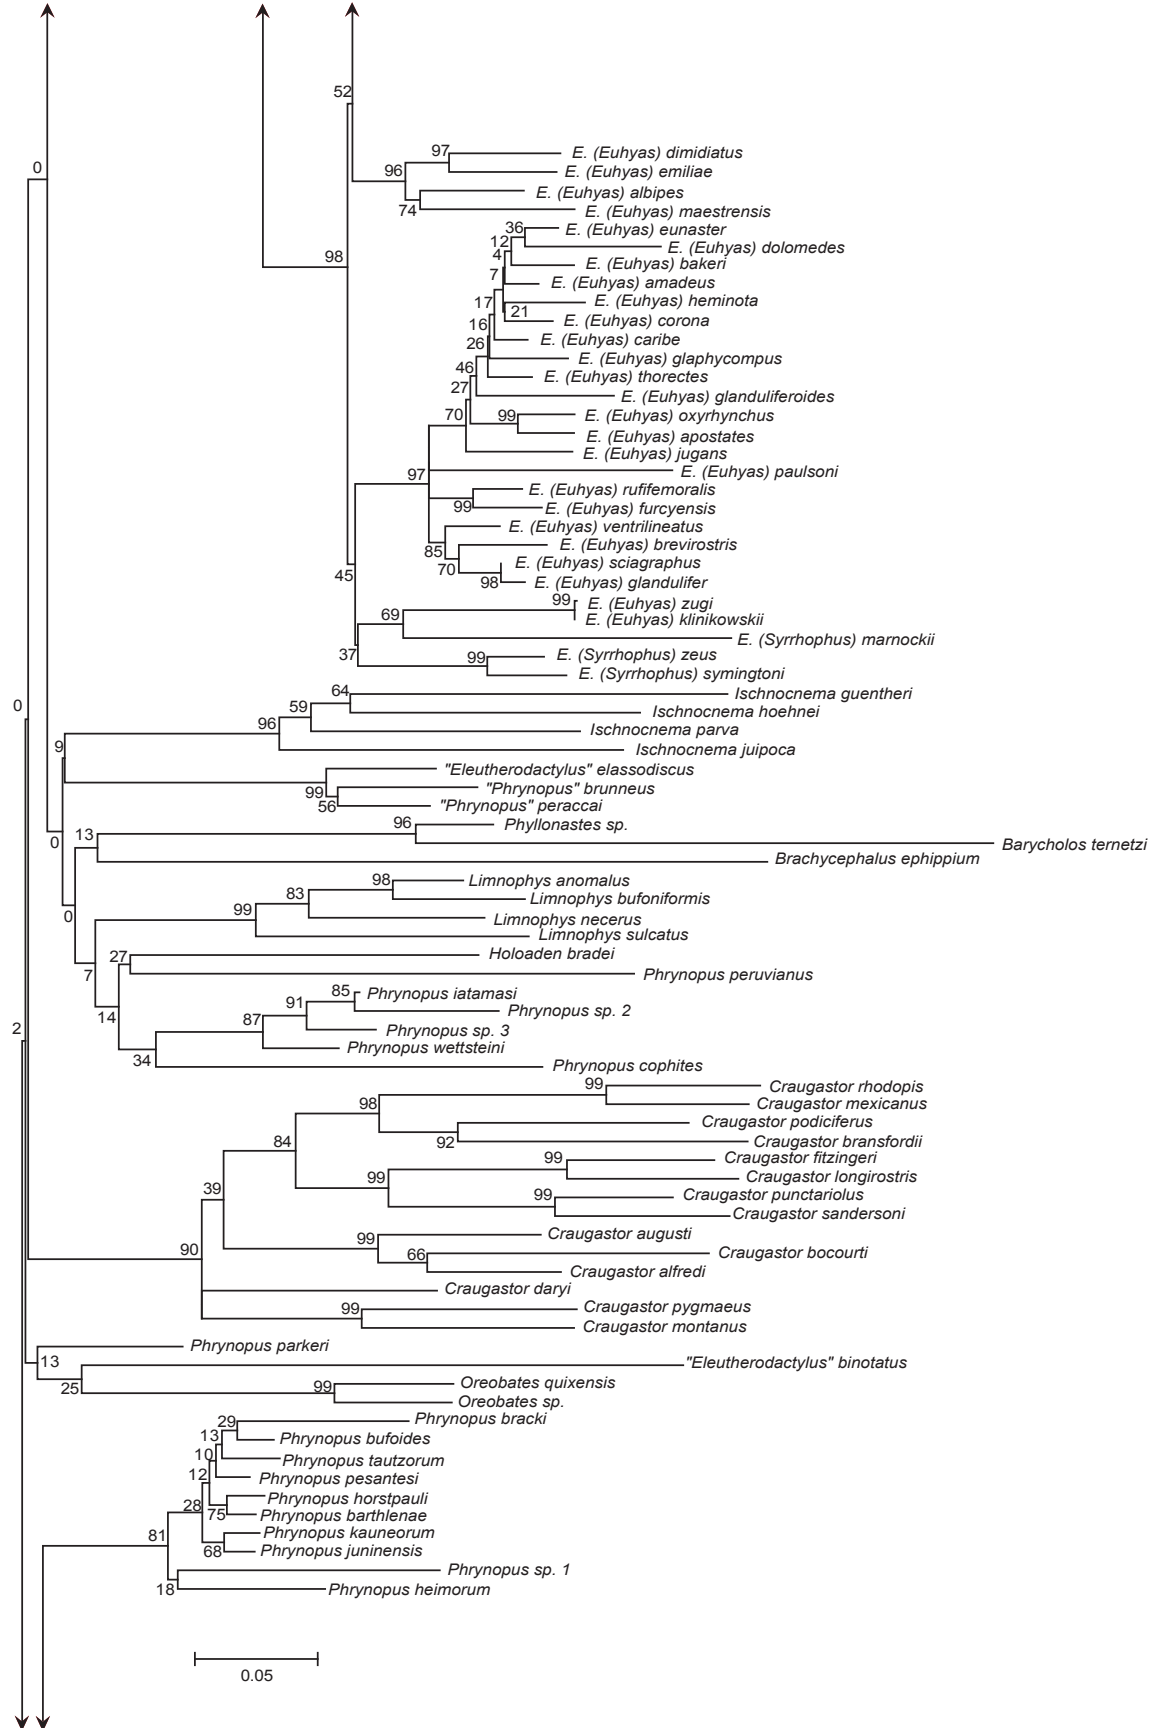

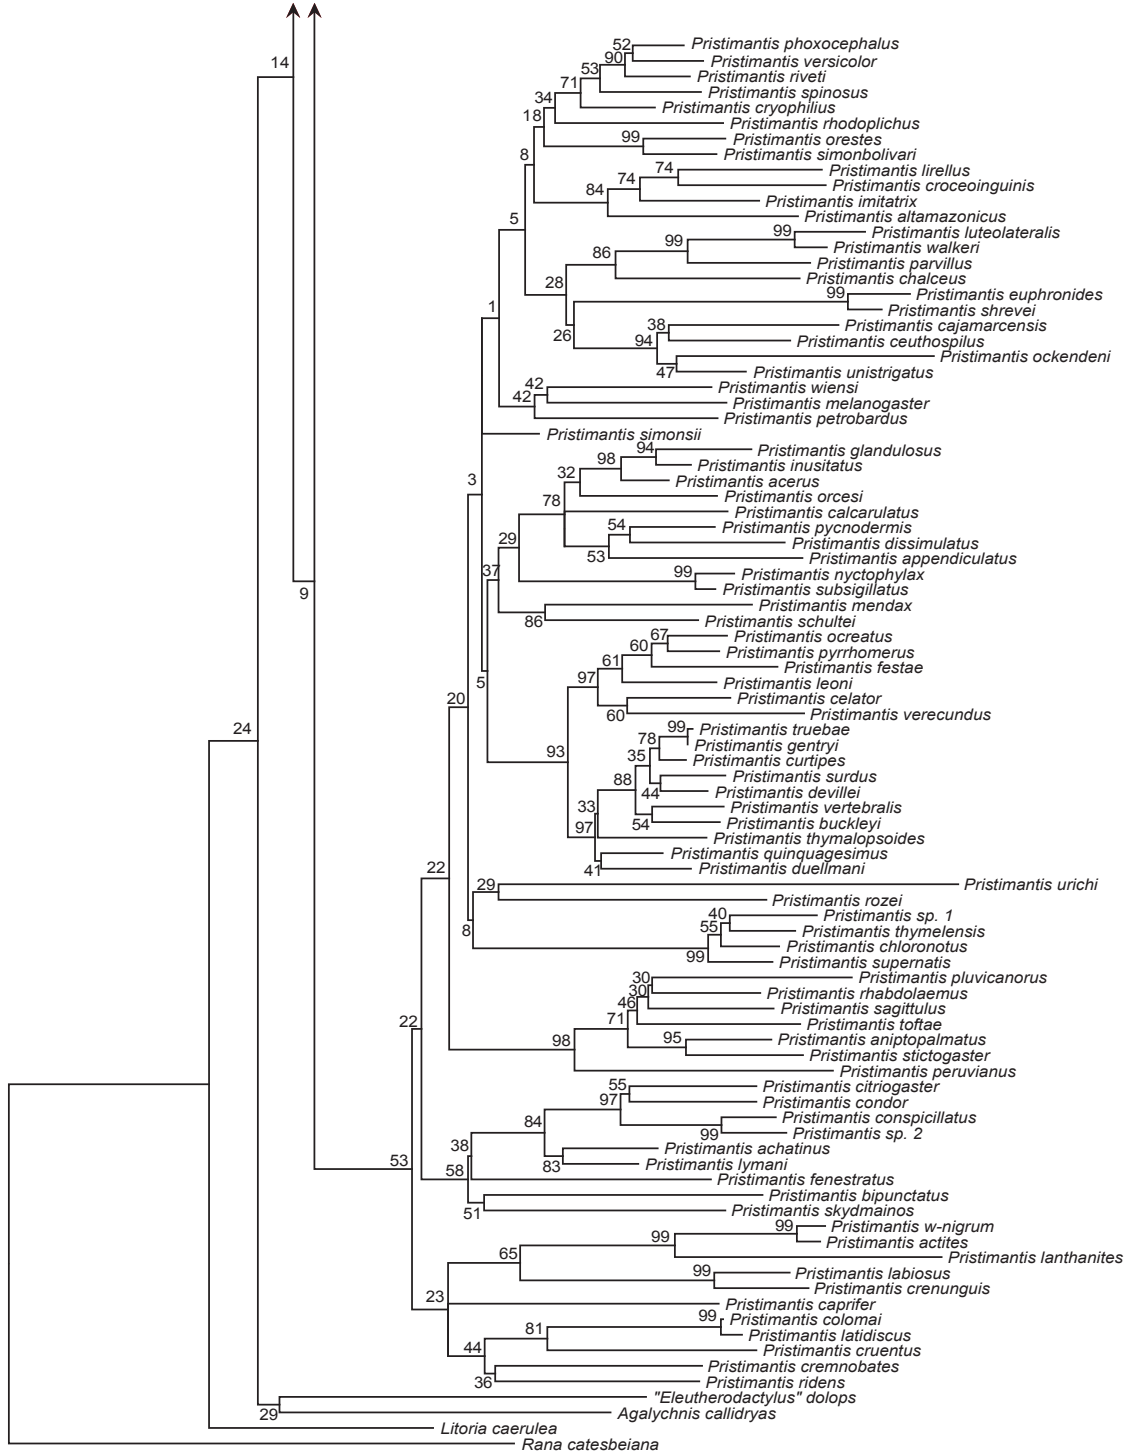

Supplement: pnas_0611051104_2.pdf [file pnas_0611051104_2.pdf]

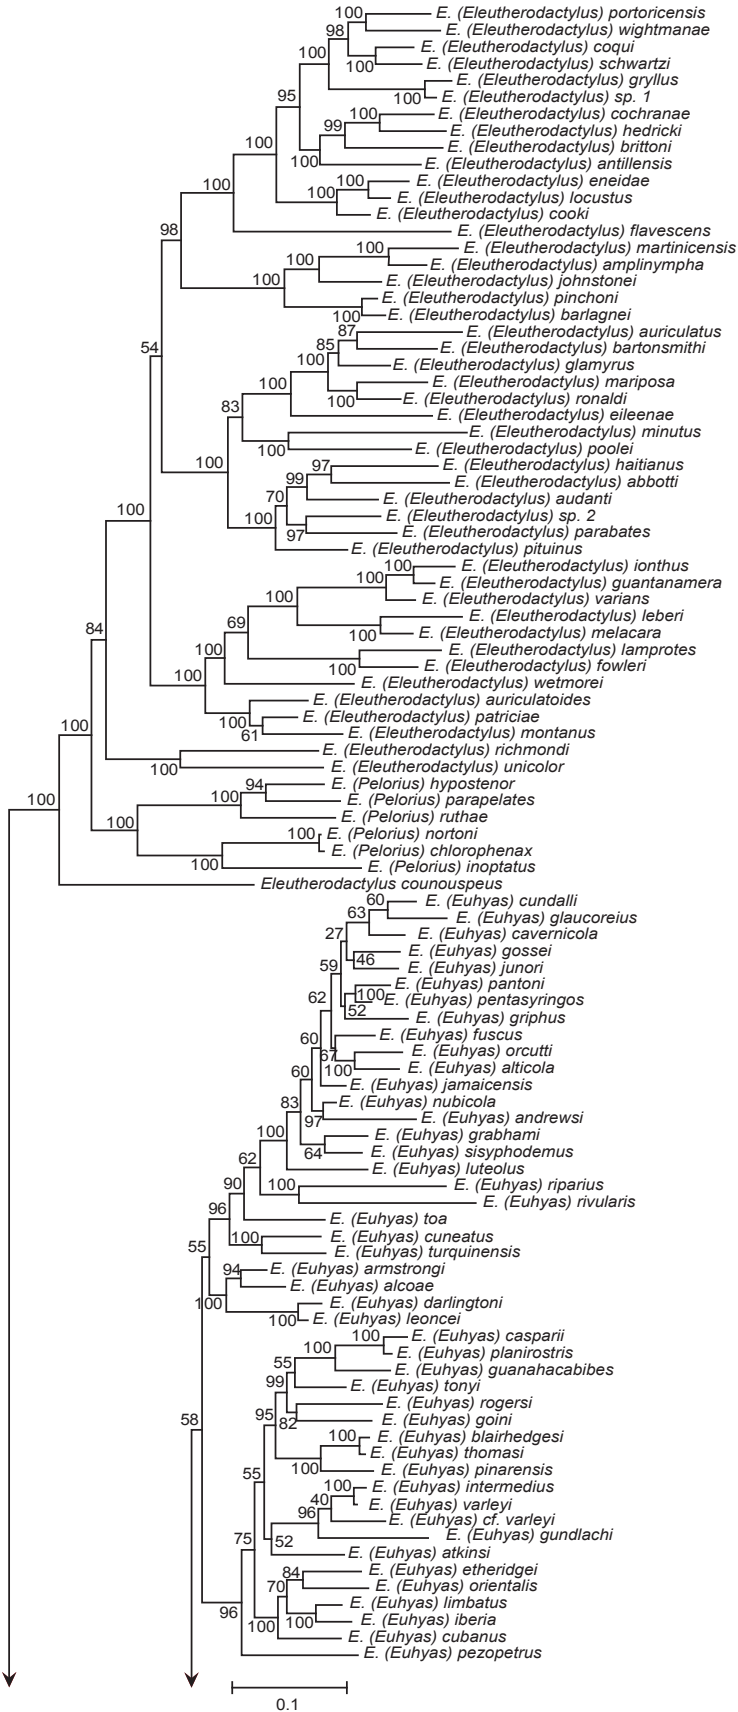

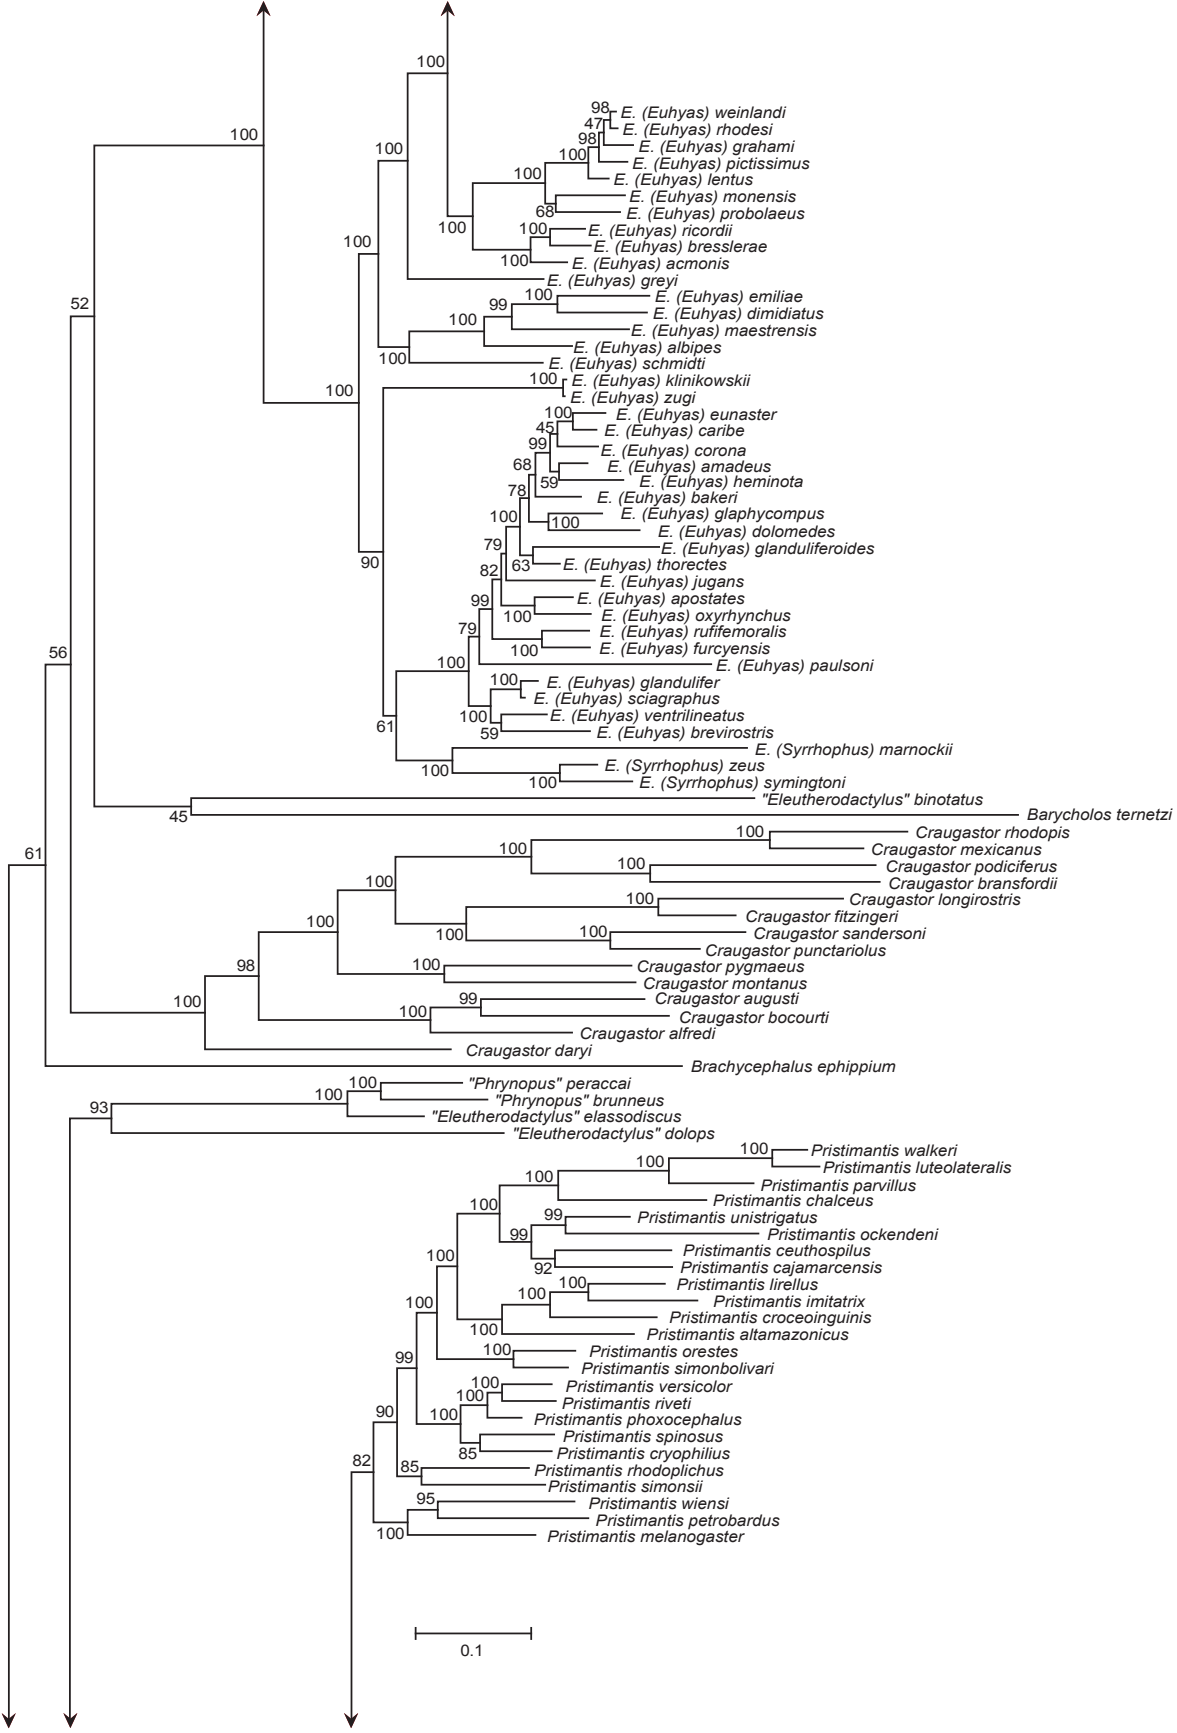

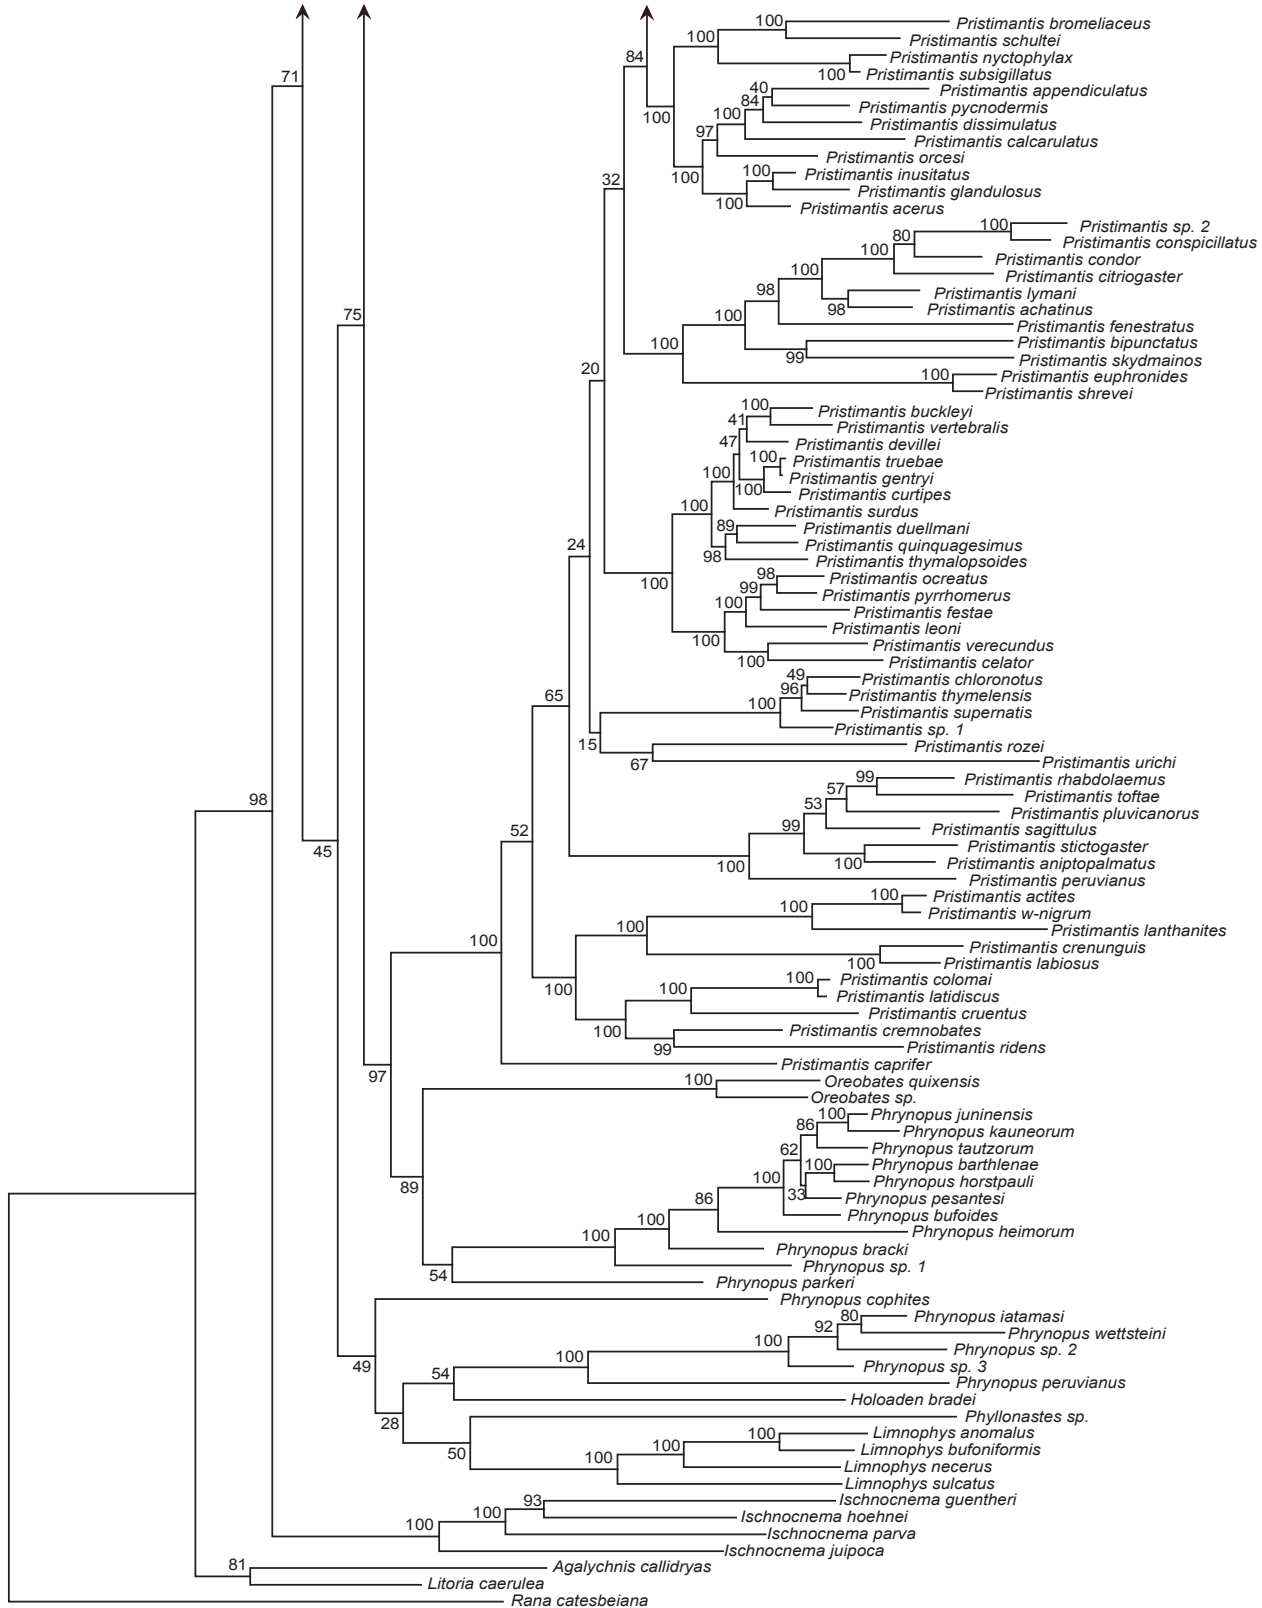

Supplement: pnas_0611051104_3.pdf [file pnas_0611051104_3.pdf]

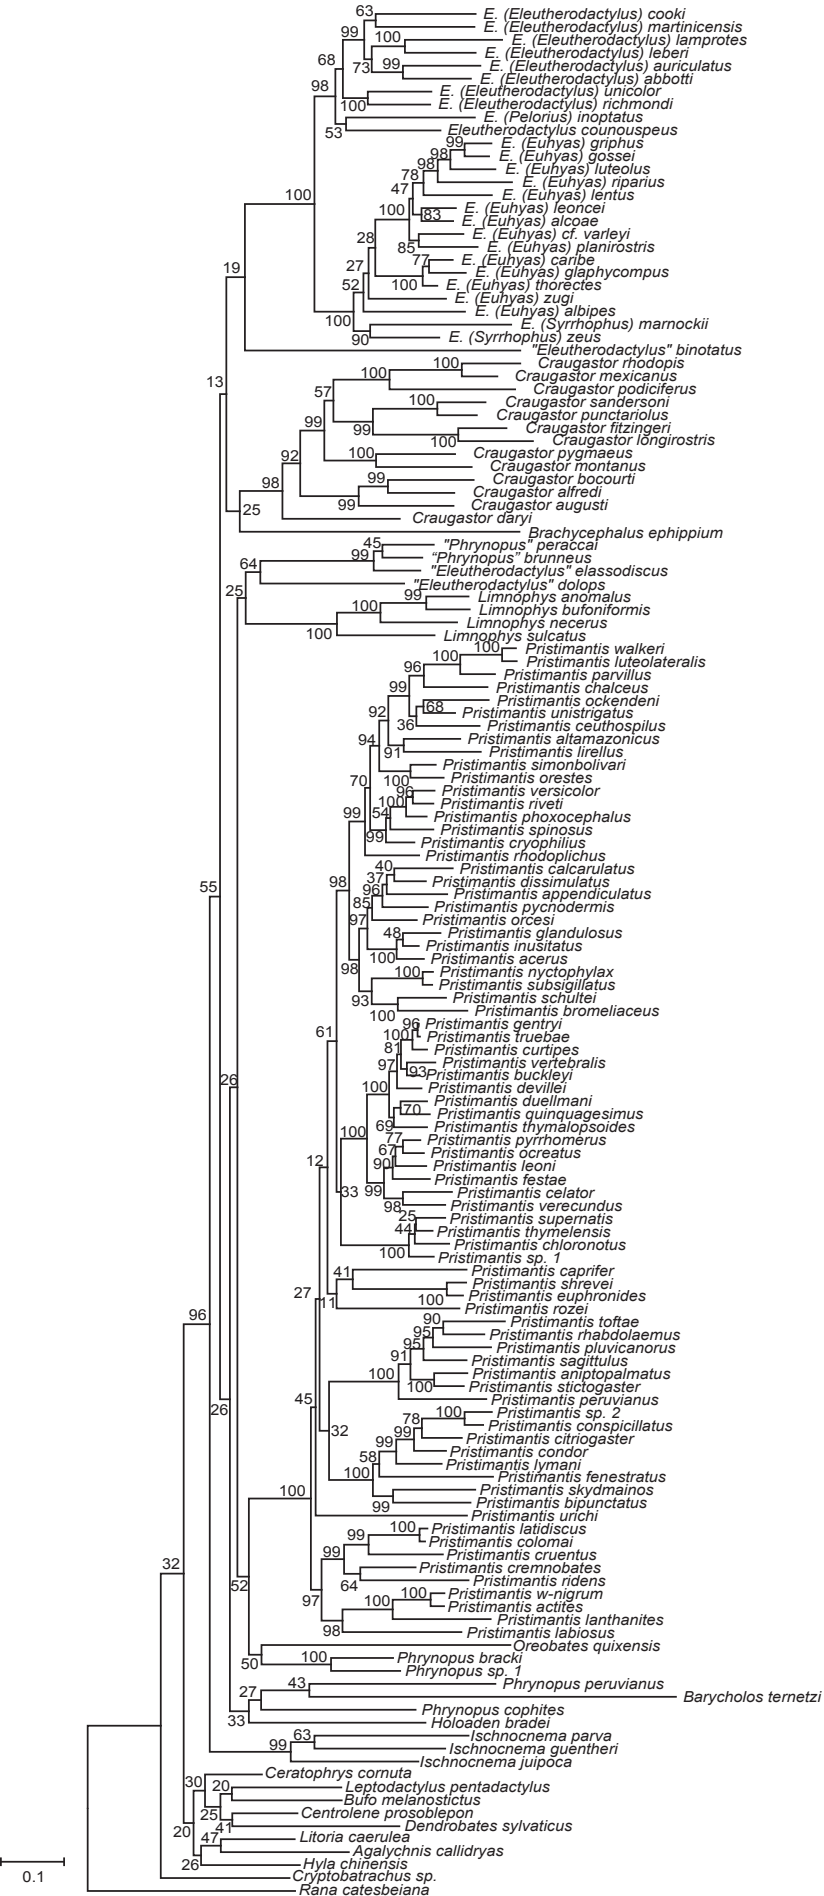

Supplement: pnas_0611051104_4.pdf [file pnas_0611051104_4.pdf]

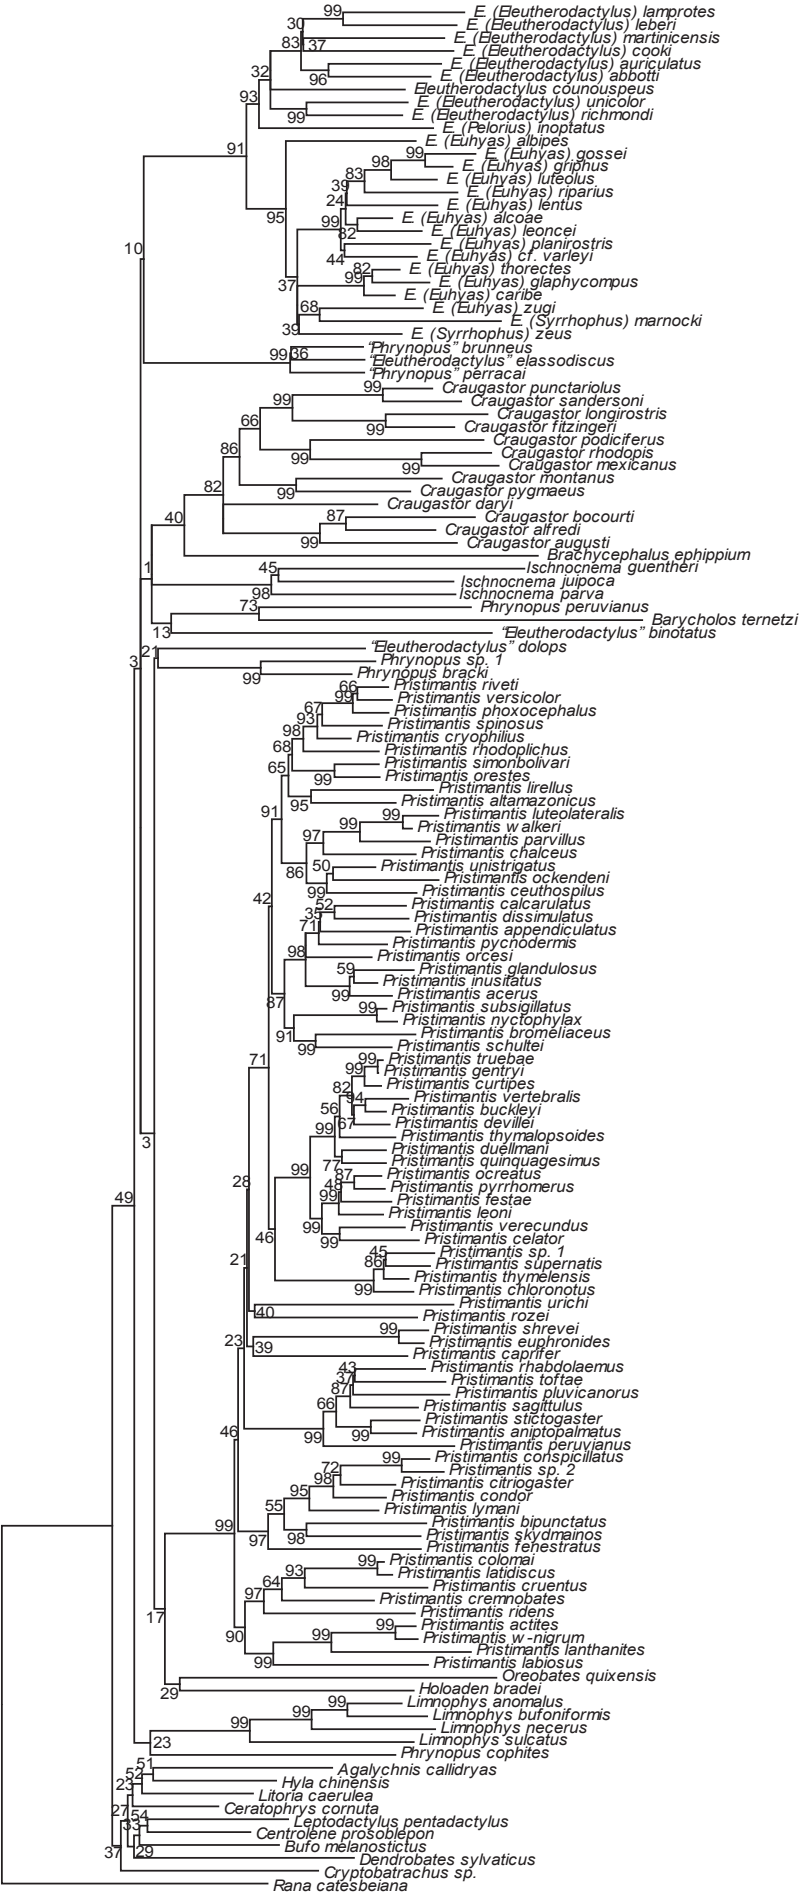

0.05

Supplement: pnas_0611051104_5.pdf [file pnas_0611051104_5.pdf]

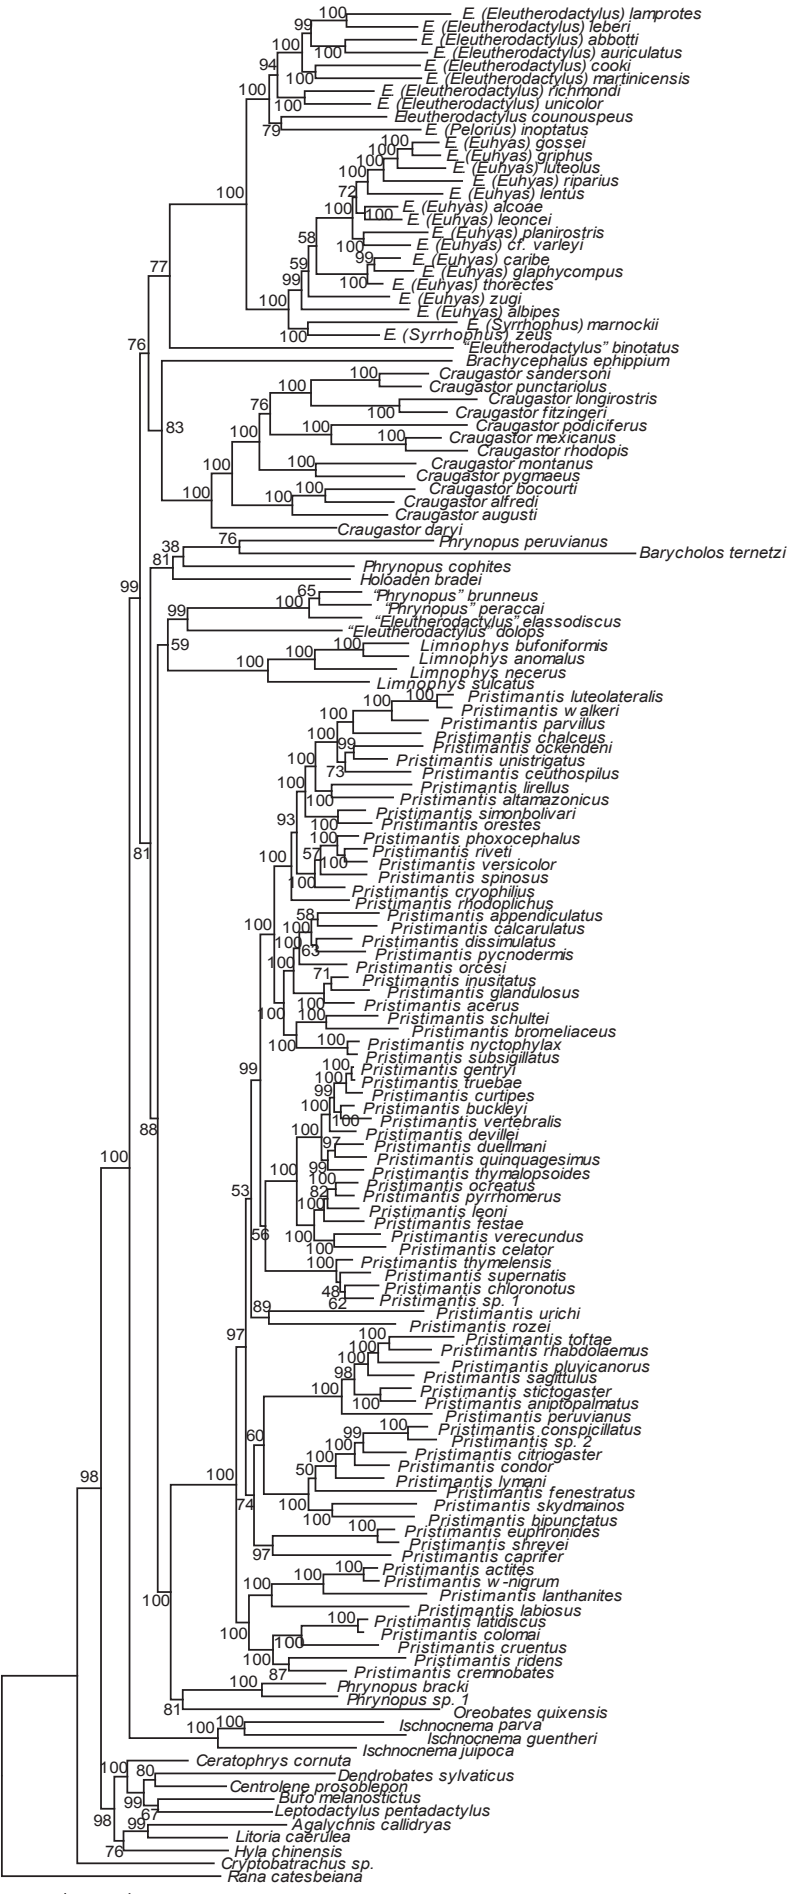

0.1

Supplement: pnas_0611051104_6.pdf [file pnas_0611051104_6.pdf]

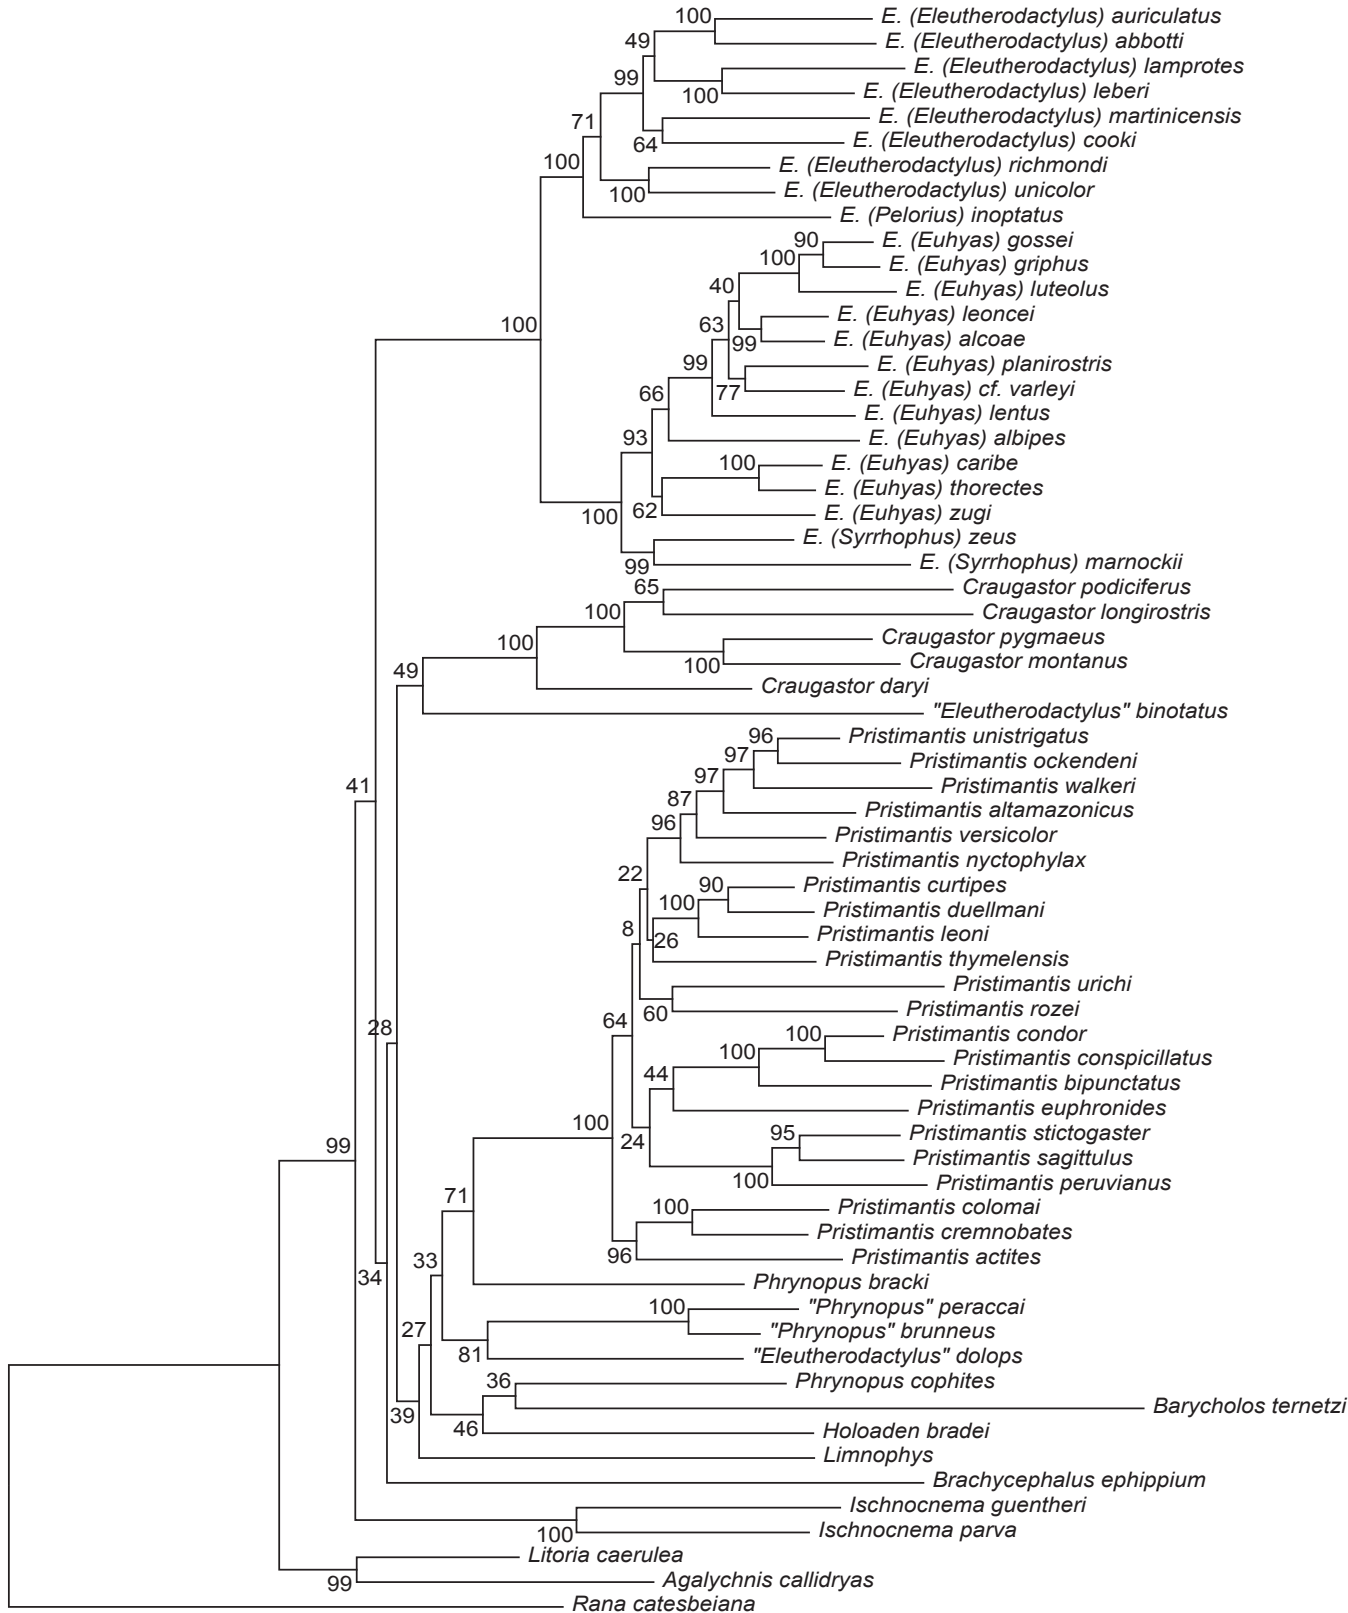

0.1

Supplement: pnas_0611051104_7.pdf [file pnas_0611051104_7.pdf]

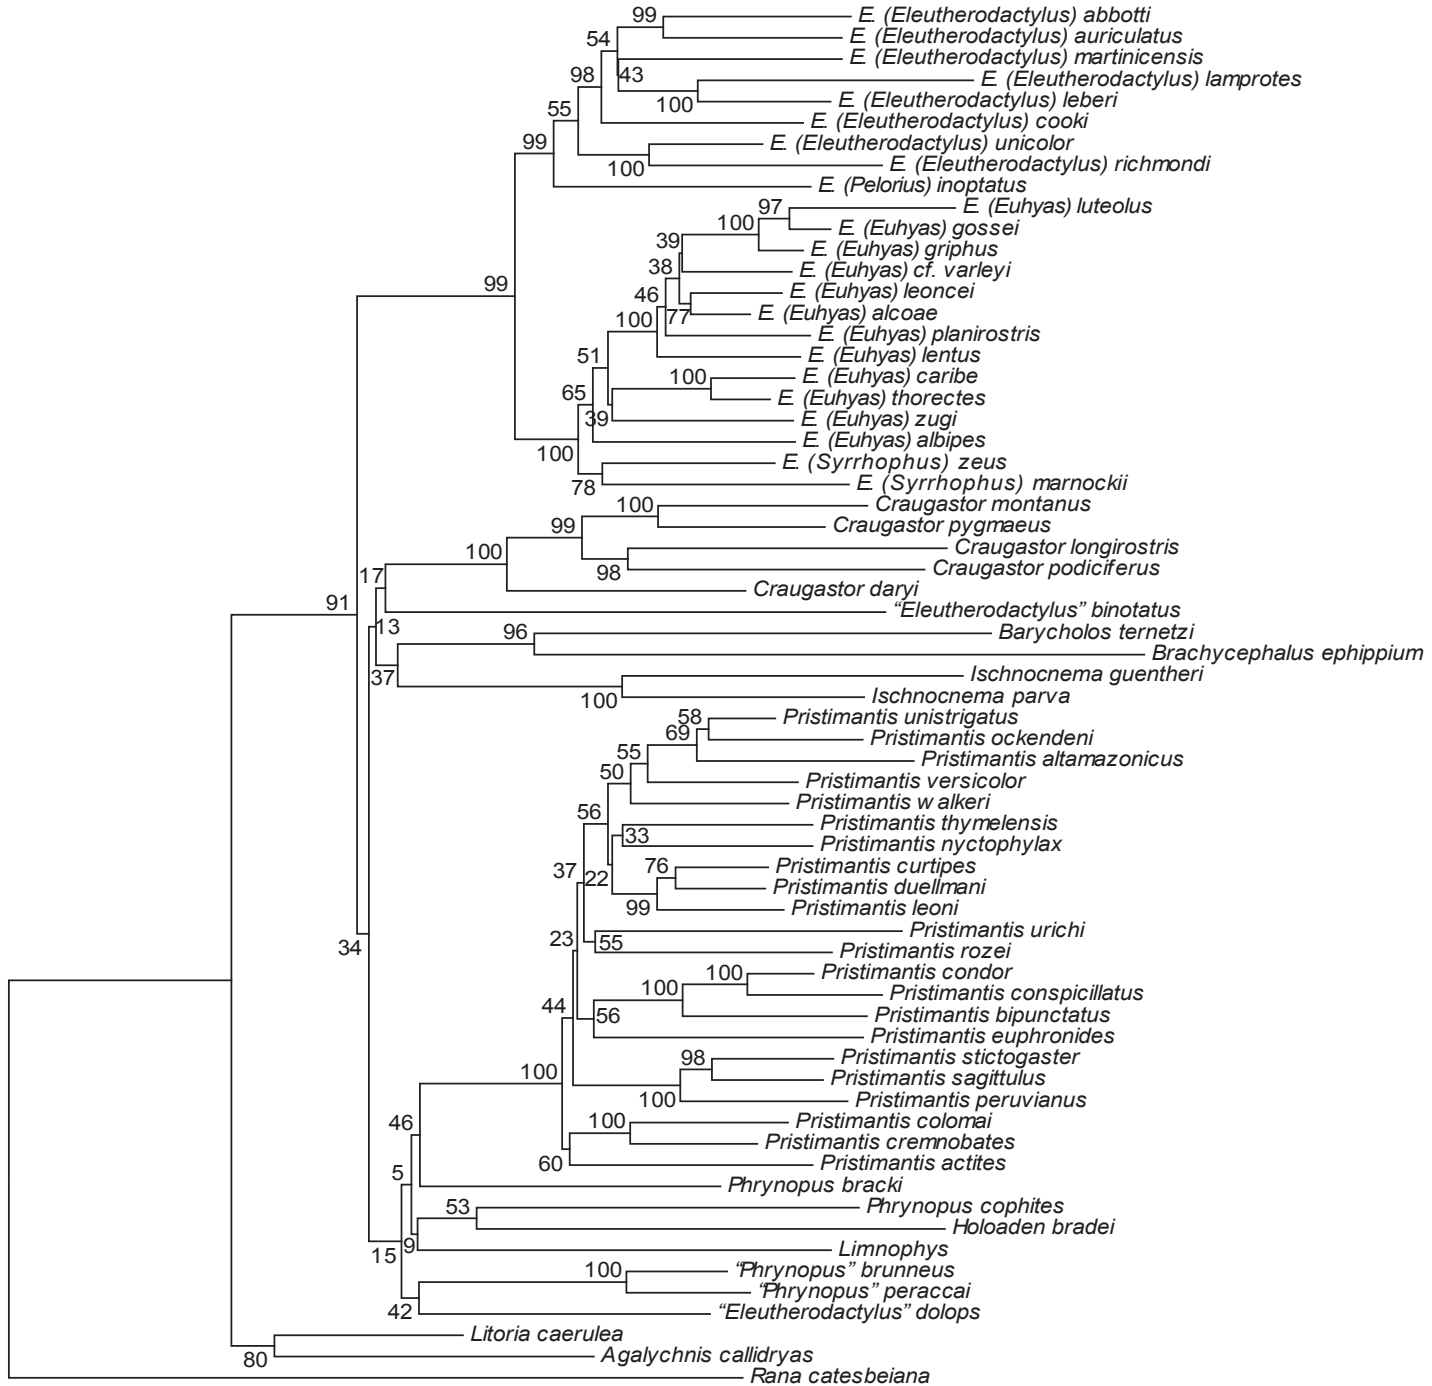

Supplement: pnas_0611051104_8.pdf [file pnas_0611051104_8.pdf]

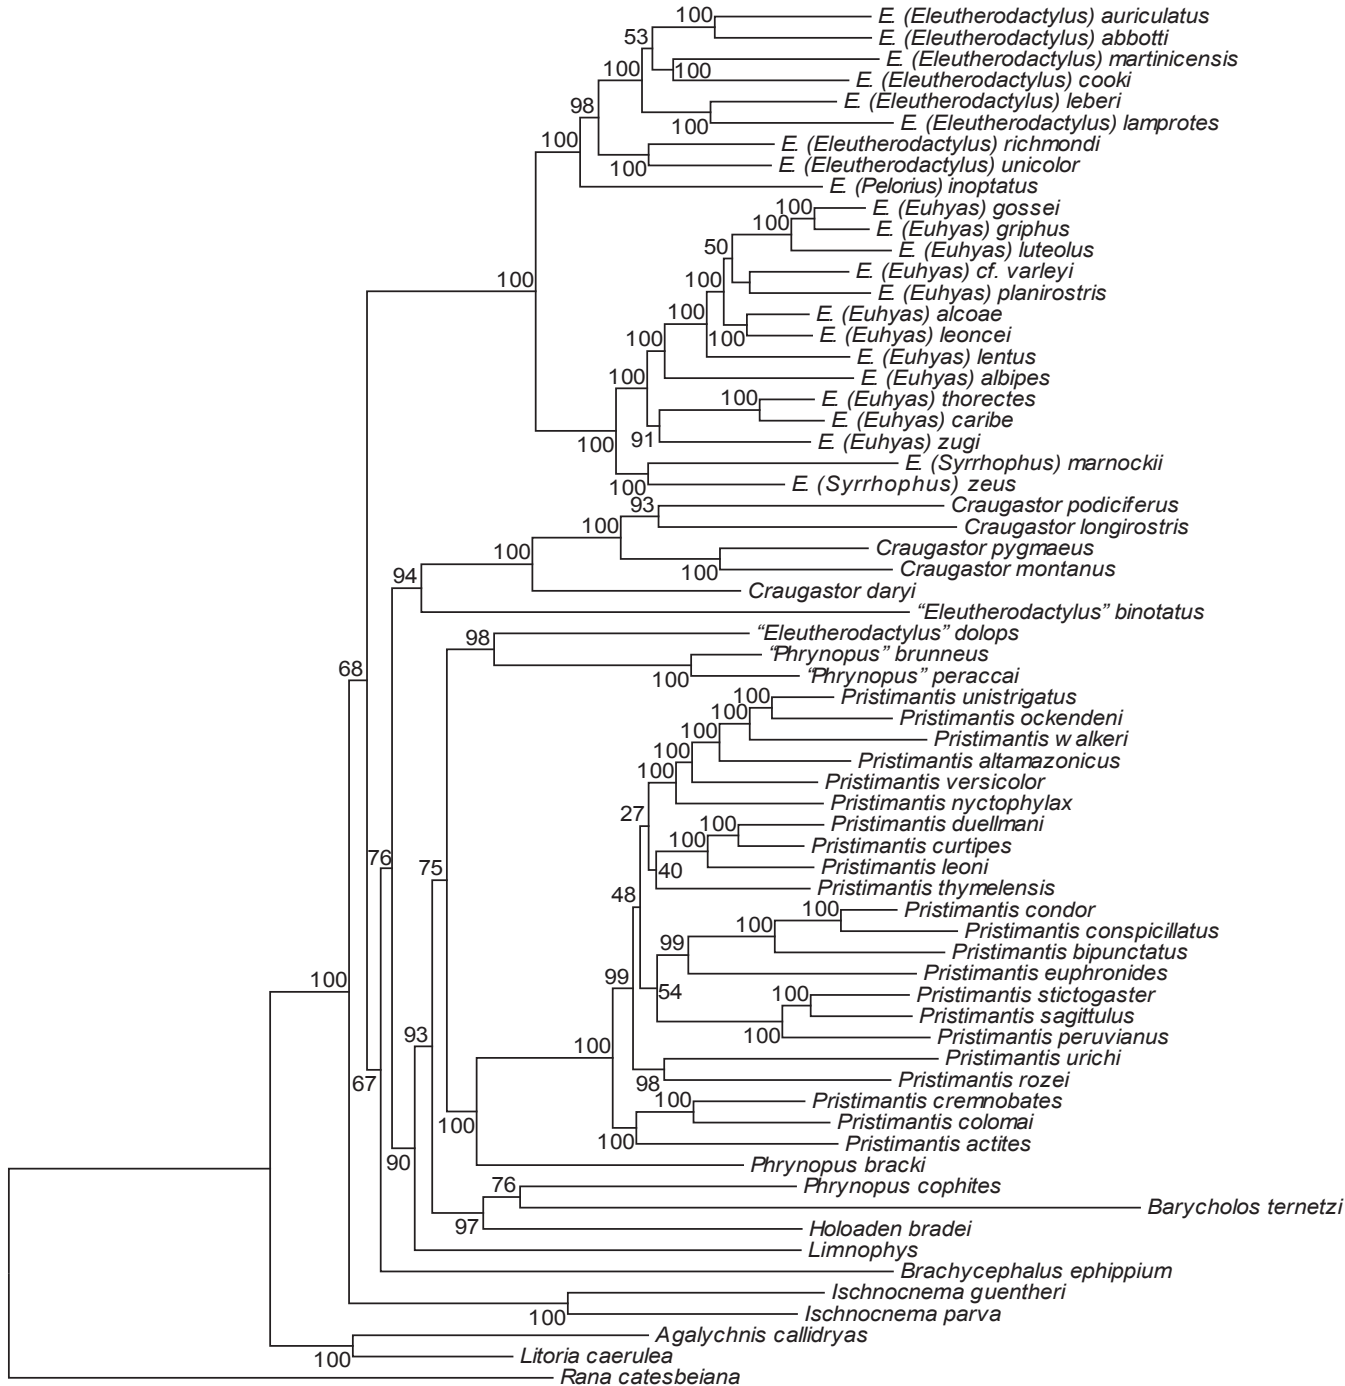

0.1

Supplement: pnas_0611051104_9.pdf [file pnas_0611051104_9.pdf]
